# Supplementary material for: Direct synthesis of pyrroles via 1,3-dipolar cycloaddition of azomethine ylides with ynones
Source: Royal Society of Chemistry journal article supplement (doi:10.1039/c3nj00067b), 2013-01-01

*Electronic Supplementary Material*

**Direct Synthesis of Pyrroles via 1,3-Dipolar Cycloaddition of  
Azomethine Ylides with Ynones**

Zheng Wang<sup>a</sup>, Ying Shi<sup>a</sup>, Xiaoyan Luo<sup>a</sup>, De-Man Han<sup>b</sup> and Wei-Ping Deng<sup>a,c\*</sup>

<sup>a</sup> *School of Pharmacy and Shanghai Key Laboratory of Functional Materials Chemistry, East China University of Science and Technology, 130 Meilong Road, Shanghai 200237, China.*

*E-mail: weiping\_deng@ecust.edu.cn*

<sup>b</sup> *Department of Chemistry, Taizhou University, 605 Dongfang Road, Linhai 317000, China.*

<sup>c</sup> *Key Laboratory of Synthetic Chemistry of Natural Substances, Shanghai Institute Organic Chemistry, Chinese Academy of Science, 345 LingLing Road, Shanghai, 200032, China.*

**Contents**

- 1. Experimental Section**
- 2. X-ray crystal structure of 3aa**
- 3. <sup>1</sup>H NMR and <sup>13</sup>C NMR spectra**

## Electronic Supplementary Material

### General Information

All Chemicals were purchased from commercial sources and they were used without further purification unless otherwise specified. Melting points were obtained on a micro melting apparatus SGW X-4 and uncorrected. HRMS (ESI) spectra were measured on a Waters LCT Premier XE spectrometer.  $^1\text{H}$  NMR spectra were recorded on a Bruker DPX 400 MHz spectrometer in chloroform- $d_3$  or DMSO- $d_6$ .  $^{13}\text{C}$  NMR spectra were recorded on a Bruker DPX 100 MHz spectrometer in chloroform- $d_3$  or DMSO- $d_6$ . Chemical shift values are reported in parts per million on the scale ( $\delta_{\text{TMS}} = 0$ ). Infrared spectra were recorded on NICOLET 5SXC instrument as thin film; frequencies are given as wavenumbers ( $\text{cm}^{-1}$ ).

### General Procedure for the Preparation of Yrones **1**.<sup>1,2</sup>

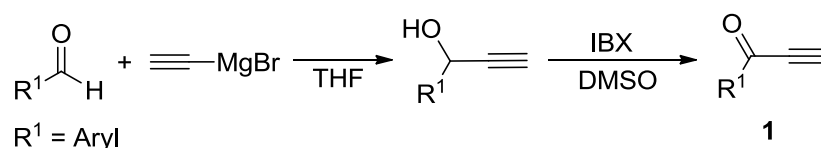

A solution of the aldehyde (10.0 mmol) in dry THF (20 mL) was added to a stirred solution of ethynylmagnesium bromide in THF (0.5 M; 30 mL, 15.0 mmol) at 0 °C. The mixture was stirred at 0 °C for 2h, warmed to room temperature and was quenched with aq. sat.  $\text{NH}_4\text{Cl}$  sol (10 mL). The organic layer was separated and the aqueous phase was extracted with EtOAc (2x10 mL). The combined extracts were evaporated to give the propargyl alcohol as yellowish oil. Without purification, this material was added to a solution of IBX (5.6 g, 20.0 mmol) in DMSO and the solution was heated to 35 °C for 6 h. The cooled reaction mixture was diluted with EtOAc (20 mL) and water (30 mL) and stirred vigorously for 10 min. Then it was filtered over celite. The organic layer was separated and the aqueous phase was extracted with ether (3x20 mL). The combined extracts were sequentially washed with aq. sat.  $\text{NaHCO}_3$  (20 mL) and  $\text{NaCl}$  (20 mL) solutions, dried ( $\text{Na}_2\text{SO}_4$ ) and evaporated in vacuo. The residue was subject to flash chromatography on silica gel (petroleum ether/ethyl acetate, 10:1) to afford pure ynone **1**. Spectral data of the products were consistent with the previous report.<sup>2</sup>

### General Procedure for AgOAc Catalyzed 1,3-Dipolar Cycloaddition of Azomethine Ylides with Yrones

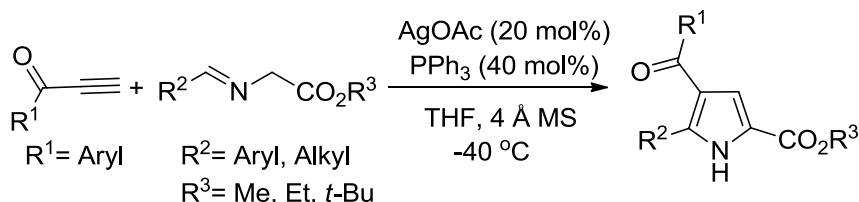

Under  $\text{N}_2$  atmosphere, AgOAc (10 mg, 0.06 mmol),  $\text{PPh}_3$  (31.5 mg, 0.12 mmol) and activated 4 Å MS were dissolved in 2 mL anhydrous THF and stirred at room temperature for about 1 h. Iminoesters **2** (0.6 mmol) were added and after the reaction mixture was reduced to -40 °C, yrones **1** (0.3 mmol) were added. Once starting material was consumed (monitored by TLC), the mixture

### Electronic Supplementary Material

was concentrated to dryness and then the residue was purified by column chromatography to give the corresponding products **3**.

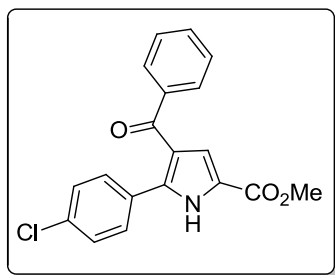

#### methyl 4-benzoyl-5-(4-chlorophenyl)-1H-pyrrole-2-carboxylate (**3aa**)

white solid, 69% yield. mp: 200-202 °C;  $^1\text{H}$  NMR (400 MHz,  $\text{CDCl}_3$ )  $\delta$  10.20 (brs, 1H), 7.80 (d,  $J$  = 7.2 Hz, 2H), 7.55-7.46 (m, 3H), 7.41 (t,  $J$  = 7.6 Hz, 2H), 7.29 (d,  $J$  = 8.3 Hz, 2H), 7.19 (d,  $J$  = 2.4 Hz, 1H), 3.80 (s, 3H);  $^{13}\text{C}$  NMR (100 MHz,  $\text{CDCl}_3$ )  $\delta$  191.6, 161.7, 139.7, 138.8, 135.2, 132.5, 130.2, 129.7, 129.2, 128.7, 128.4, 122.1, 119.8, 52.1; IR (KBr)  $\nu$  3449, 3307, 2922, 1702, 1642, 1598, 1460, 1280, 1200, 1086, 1007, 892, 853, 746, 695, 598, 509  $\text{cm}^{-1}$ ; HRMS(ESI): calcd for  $\text{C}_{19}\text{H}_{13}\text{NO}_3\text{Cl}$  ( $\text{M}+\text{H}^+$ ) 338.0584, found 338.0581.

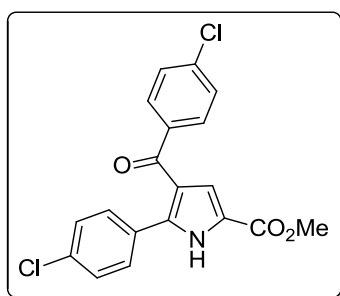

#### methyl 4-(4-chlorobenzoyl)-5-(4-chlorophenyl)-1H-pyrrole-2-carboxylate (**3ba**)

white solid, 63% yield. mp: 197-200 °C;  $^1\text{H}$  NMR (400 MHz,  $\text{DMSO}-d_6$ )  $\delta$  12.94 (s, 1H), 7.70 (d,  $J$  = 8.8 Hz, 2H), 7.51 (dd,  $J$  = 8.4, 1.9 Hz, 4H), 7.40 (d,  $J$  = 8.4 Hz, 2H), 7.03 (s, 1H), 3.81 (s, 3H);  $^{13}\text{C}$  NMR (100 MHz,  $\text{DMSO}-d_6$ )  $\delta$  189.5, 160.4, 139.6, 137.3, 137.1, 133.3, 131.2, 131.0, 129.2, 128.4, 127.9, 122.4, 121.0, 118.8, 51.6; IR (KBr)  $\nu$  3450, 3298, 2922, 2852, 1694, 1653, 1583, 1557, 1439, 1331, 1280, 1244, 1208, 1156, 1086, 1014, 891, 828, 762, 726, 671, 536  $\text{cm}^{-1}$ ; HRMS(ESI): calcd for  $\text{C}_{19}\text{H}_{14}\text{NO}_3\text{Cl}_2$  ( $\text{M}+\text{H}^+$ ) 374.0351, found 374.0348.

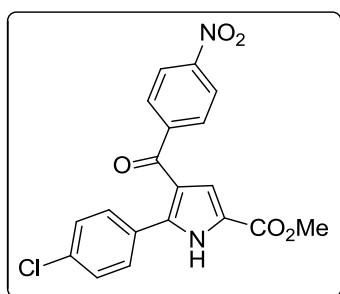

### Electronic Supplementary Material

#### methyl 5-(4-chlorophenyl)-4-(4-nitrobenzoyl)-1H-pyrrole-2-carboxylate (3ca)

yellow solid, 71% yield. mp: 239-241 °C; <sup>1</sup>H NMR (400 MHz, DMSO-*d*<sub>6</sub>) δ 13.04 (s, 1H), 8.25 (d, *J* = 8.8 Hz, 2H), 7.86 (d, *J* = 8.8 Hz, 2H), 7.53 (d, *J* = 8.4 Hz, 2H), 7.40 (d, *J* = 8.4 Hz, 2H), 7.02 (d, *J* = 2.4 Hz, 1H), 3.80 (s, 3H); <sup>13</sup>C NMR (100 MHz, DMSO-*d*<sub>6</sub>) δ 189.1, 160.3, 149.0, 144.2, 140.3, 133.6, 131.5, 130.1, 129.1, 127.9, 123.5, 122.7, 120.6, 119.0, 51.7; IR (KBr) ν 3283, 3104, 2960, 2853, 1705, 1654, 1602, 1558, 1523, 1442, 1412, 1353, 1281, 1251, 1213, 1092, 1005, 902, 848, 764, 745, 713, 510, 484 cm<sup>-1</sup>; HRMS(ESI): calcd for C<sub>19</sub>H<sub>14</sub>N<sub>2</sub>O<sub>5</sub>Cl (M+H<sup>+</sup>) 385.0591, found 385.0586.

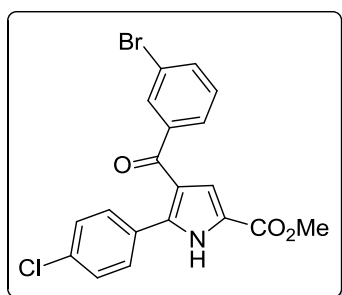

#### methyl 4-(3-bromobenzoyl)-5-(4-chlorophenyl)-1H-pyrrole-2-carboxylate (3da)

white solid, 69% yield. mp: 234-235 °C. <sup>1</sup>H NMR (400 MHz, DMSO-*d*<sub>6</sub>) δ 12.96 (s, 1H), 7.79-7.71 (m, 2H), 7.65 (d, *J* = 7.8 Hz, 1H), 7.49 (d, *J* = 8.4 Hz, 2H), 7.44-7.36 (m, 3H), 7.04 (s, 1H), 3.81 (s, 3H); <sup>13</sup>C NMR (100 MHz, DMSO-*d*<sub>6</sub>) δ 189.1, 160.4, 140.7, 139.9, 134.7, 133.4, 131.5, 131.3, 130.5, 129.2, 128.1, 127.9, 122.5, 121.6, 120.9, 118.7, 51.6; IR (KBr) ν 3318, 3059, 2950, 1917, 1700, 1643, 1560, 1455, 1414, 1343, 1282, 1244, 1199, 1162, 1087, 1006, 899, 836, 763, 732, 681, 600, 511 cm<sup>-1</sup>; HRMS(ESI): calcd for C<sub>19</sub>H<sub>14</sub>NO<sub>3</sub>ClBr (M+H<sup>+</sup>) 417.9846, found 417.9850.

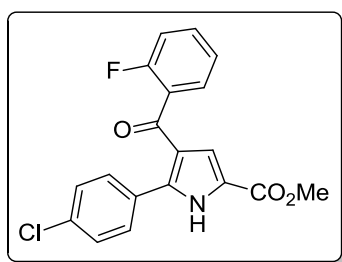

#### methyl 5-(4-chlorophenyl)-4-(2-fluorobenzoyl)-1H-pyrrole-2-carboxylate (3ea)

white solid, 67% yield. mp: 217-218 °C. <sup>1</sup>H NMR (400 MHz, DMSO-*d*<sub>6</sub>) δ 12.98 (s, 1H), 7.56-7.45 (m, 4H), 7.40 (d, *J* = 8.4 Hz, 2H), 7.24 (t, *J* = 7.3 Hz, 1H), 7.21-7.15 (m, 1H), 6.95 (s, 1H), 3.80 (s, 3H); <sup>13</sup>C NMR (100 MHz, DMSO-*d*<sub>6</sub>) δ 187.0, 160.3, 158.9 (d, *J* = 247.4 Hz), 140.1, 133.6, 132.8 (d, *J* = 8.3 Hz), 131.5, 130.0 (d, *J* = 2.7 Hz), 128.9, 128.4 (d, *J* = 14.8 Hz), 127.7, 124.4 (d, *J* = 3.1 Hz), 122.7, 122.1, 118.7, 115.9 (d, *J* = 21.5 Hz), 51.6; IR (KBr) ν 3447, 3164, 3110, 2946, 1727, 1629, 1611, 1575, 1463, 1337, 1288, 1204, 1169, 1087, 1026, 897, 841, 760, 656, 510 cm<sup>-1</sup>; HRMS(ESI): calcd for C<sub>19</sub>H<sub>14</sub>NO<sub>3</sub>ClF (M+H<sup>+</sup>) 358.0646, found 358.0652.

### Electronic Supplementary Material

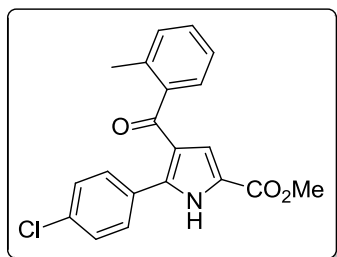

#### methyl 5-(4-chlorophenyl)-4-(2-methylbenzoyl)-1H-pyrrole-2-carboxylate (3fa)

white solid, 62% yield. mp: 140-141 °C.  $^1\text{H}$  NMR (400 MHz,  $\text{DMSO-}d_6$ )  $\delta$  12.92 (s, 1H), 7.54 (d,  $J = 8.5$  Hz, 2H), 7.40 (d,  $J = 8.5$  Hz, 2H), 7.33 (td,  $J = 7.4, 1.2$  Hz, 1H), 7.28 (d,  $J = 7.4$  Hz, 1H), 7.23 (d,  $J = 7.4$  Hz, 1H), 7.17 (t,  $J = 7.2$  Hz, 1H), 6.78 (s, 1H), 3.77 (s, 3H), 2.24 (s, 3H);  $^{13}\text{C}$  NMR (100 MHz,  $\text{DMSO-}d_6$ )  $\delta$  192.5, 160.3, 140.0, 139.8, 135.3, 133.4, 131.4, 130.6, 129.8, 129.2, 127.9, 127.7, 125.2, 122.4, 122.3, 119.2, 51.6, 19.4; IR (KBr)  $\nu$  3565, 3472, 3304, 3071, 2956, 2852, 1701, 1638, 1558, 1471, 1443, 1340, 1278, 1254, 1205, 1168, 1092, 1006, 894, 829, 747, 667, 506  $\text{cm}^{-1}$ ; HRMS(ESI): calcd for  $\text{C}_{20}\text{H}_{17}\text{NO}_3\text{Cl}$  ( $\text{M}+\text{H}^+$ ) 354.0897, found 354.0895.

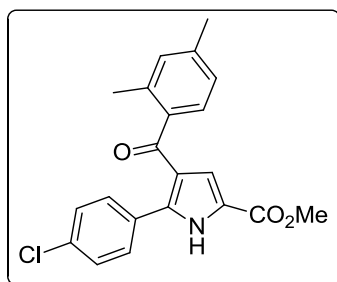

#### methyl 5-(4-chlorophenyl)-4-(2,4-dimethylbenzoyl)-1H-pyrrole-2-carboxylate (3ga)

white solid, 53 % yield. mp: 195-197 °C.  $^1\text{H}$  NMR (400 MHz,  $\text{DMSO-}d_6$ )  $\delta$  12.88 (s, 1H), 7.53 (d,  $J = 8.6$  Hz, 2H), 7.40 (d,  $J = 8.5$  Hz, 2H), 7.19 (d,  $J = 7.7$  Hz, 1H), 7.05 (s, 1H), 6.98 (d,  $J = 7.5$  Hz, 1H), 6.79 (s, 1H), 3.77 (s, 3H), 2.28 (s, 3H), 2.23 (s, 3H);  $^{13}\text{C}$  NMR (100 MHz,  $\text{DMSO-}d_6$ )  $\delta$  192.4, 160.4, 139.7, 139.6, 137.1, 135.7, 133.3, 131.3, 129.3, 128.5, 127.7, 125.7, 122.6, 122.2, 119.2, 51.6, 20.8, 19.5; IR (KBr)  $\nu$  3447, 3296, 2922, 2853, 1701, 1573, 1469, 1380, 1278, 1133, 1007, 871, 831, 720, 506  $\text{cm}^{-1}$ ; HRMS(ESI): calcd for  $\text{C}_{20}\text{H}_{17}\text{NO}_4\text{Cl}$  ( $\text{M}+\text{H}^+$ ) 370.0846, found 370.0849.

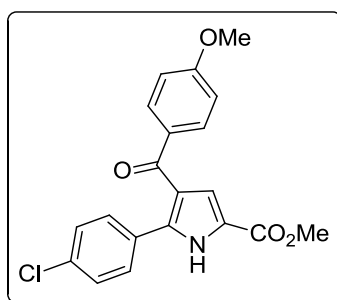

### Electronic Supplementary Material

#### methyl 5-(4-chlorophenyl)-4-(4-methoxybenzoyl)-1H-pyrrole-2-carboxylate (3ha)

white solid, 80 % yield. mp: 189-190 °C. <sup>1</sup>H NMR (400 MHz, CDCl<sub>3</sub>) δ 9.94 (s, 1H), 7.82 (d, *J* = 8.8 Hz, 2H), 7.47 (d, *J* = 8.6 Hz, 2H), 7.33 (d, *J* = 8.6 Hz, 2H), 7.17 (d, *J* = 2.5 Hz, 1H), 6.89 (d, *J* = 8.8 Hz, 2H), 3.86 (s, 3H), 3.83 (s, 3H); <sup>13</sup>C NMR (100 MHz, CDCl<sub>3</sub>) δ 190.4, 163.3, 161.6, 138.9, 135.0, 132.2, 131.4, 130.0, 129.4, 128.8, 122.6, 122.1, 119.4, 113.6, 55.6, 52.0; IR (KBr) ν 2350, 3291, 3019, 2952, 2852, 1698, 1644, 1611, 1560, 1475, 1450, 1409, 1262, 1204, 1164, 1116, 1037, 1013, 891, 839, 750, 725, 646, 610, 543 cm<sup>-1</sup>; HRMS(ESI): calcd for C<sub>20</sub>H<sub>17</sub>NO<sub>4</sub>Cl (M+H<sup>+</sup>) 370.0846, found 370.0849.

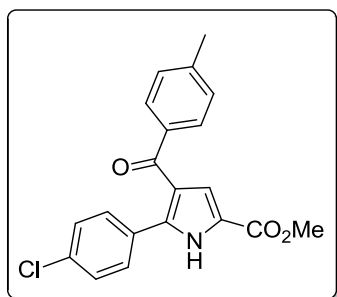

#### methyl 5-(4-chlorophenyl)-4-(4-methylbenzoyl)-1H-pyrrole-2-carboxylate (3ia)

white solid, 65 % yield. mp: 162-164 °C. <sup>1</sup>H NMR (400 MHz, DMSO-*d*<sub>6</sub>) δ 12.87 (s, 1H), 7.62 (d, *J* = 8.0 Hz, 2H), 7.52 (d, *J* = 8.6 Hz, 2H), 7.41 (d, *J* = 8.6 Hz, 2H), 7.27 (d, *J* = 7.9 Hz, 2H), 7.00 (d, *J* = 1.6 Hz, 1H), 3.81 (s, 3H), 2.36 (s, 3H); <sup>13</sup>C NMR (100 MHz, DMSO-*d*<sub>6</sub>) δ 190.4, 160.5, 142.6, 139.1, 135.9, 133.2, 131.1, 129.4, 129.3, 128.9, 127.9, 122.2, 121.5, 118.8, 51.6, 21.1; IR (KBr) ν 3450, 3288, 3269, 2955, 2920, 1692, 1635, 1603, 1556, 1455, 1412, 1339, 1280, 1254, 1204, 1160, 1087, 1002, 896, 836, 762, 673, 552, 511, 465 cm<sup>-1</sup>; HRMS(ESI): calcd for C<sub>20</sub>H<sub>17</sub>NO<sub>3</sub>Cl (M+H<sup>+</sup>) 354.0897, found 354.0893.

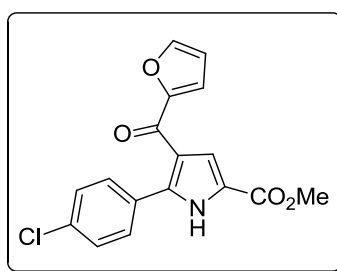

#### methyl 5-(4-chlorophenyl)-4-(furan-2-carbonyl)-1H-pyrrole-2-carboxylate (3ja)

pale yellow solid, 68% yield. mp: 192-194 °C. <sup>1</sup>H NMR (400 MHz, CDCl<sub>3</sub>) δ 10.03 (s, 1H), 7.62-7.60 (m, 1H), 7.56-7.52 (m, 3H), 7.35 (d, *J* = 8.5 Hz, 2H), 7.21 (d, *J* = 3.1 Hz, 1H), 6.54 (dd, *J* = 3.5, 1.6 Hz, 1H), 3.83 (s, 3H); <sup>13</sup>C NMR (100 MHz, CDCl<sub>3</sub>) δ 177.4, 161.6, 153.4, 146.5, 139.9, 135.2, 130.3, 129.4, 128.7, 122.4, 121.0, 119.2, 118.9, 112.3, 52.1; IR (KBr) ν 3451, 3269, 3126, 2950, 1696, 1624, 1560, 1470, 1436, 1335, 1284, 1259, 1211, 1089, 1018, 938, 845, 759, 598, 560, 513 cm<sup>-1</sup>; HRMS(ESI): calcd for C<sub>17</sub>H<sub>13</sub>NO<sub>4</sub>Cl (M+H<sup>+</sup>) 330.0533, found 330.0530.

### Electronic Supplementary Material

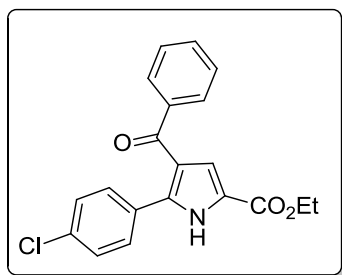

#### ethyl 4-benzoyl-5-(4-chlorophenyl)-1H-pyrrole-2-carboxylate (3ab)

white solid, 69% yield. mp: 165-167 °C. <sup>1</sup>H NMR (400 MHz, CDCl<sub>3</sub>) δ 10.30 (s, 1H), 7.80 (d, *J* = 7.1 Hz, 2H), 7.55-7.46 (m, 3H), 7.41 (t, *J* = 7.6 Hz, 2H), 7.29 (d, *J* = 8.5 Hz, 2H), 7.18 (d, *J* = 2.5 Hz, 1H), 4.20 (q, *J* = 7.1 Hz, 2H), 1.30 (t, *J* = 7.1 Hz, 3H); <sup>13</sup>C NMR (100 MHz, CDCl<sub>3</sub>) δ 191.7, 161.4, 139.7, 138.9, 135.1, 132.4, 130.3, 129.7, 129.4, 128.6, 128.3, 122.5, 122.1, 119.6, 61.2, 14.4; IR (KBr) ν 3449, 3280, 2922, 2852, 1683, 1653, 1600, 1455, 1421, 1334, 1280, 1251, 1204, 1164, 1091, 1022, 896, 832, 777, 739, 700, 512 cm<sup>-1</sup>; HRMS(ESI): calcd for C<sub>20</sub>H<sub>17</sub>NO<sub>3</sub>Cl (M+H<sup>+</sup>) 354.0897, found 354.0894.

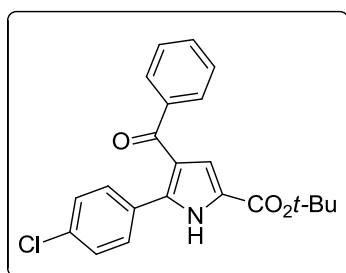

#### tert-butyl 4-benzoyl-5-(4-chlorophenyl)-1H-pyrrole-2-carboxylate (3ac)

white solid, 69%. mp: 220-221 °C. <sup>1</sup>H NMR (400 MHz, CDCl<sub>3</sub>) δ 9.77 (brs, 1H), 7.79 (d, *J* = 8.4 Hz, 2H), 7.51 (t, *J* = 7.4 Hz, 1H), 7.44 (d, *J* = 8.5 Hz, 2H), 7.40 (t, *J* = 7.6 Hz, 2H), 7.29 (d, *J* = 8.5 Hz, 2H), 7.10 (d, *J* = 2.5 Hz, 1H), 1.50 (s, 9H); <sup>13</sup>C NMR (100 MHz, CDCl<sub>3</sub>) δ 191.8, 160.5, 138.9, 138.9, 135.0, 132.4, 130.1, 129.7, 129.5, 128.8, 128.3, 124.0, 122.0, 118.9, 82.1, 28.3; IR (KBr) ν 3447, 3179, 2924, 2853, 1893, 1707, 1630, 1574, 1456, 1367, 1292, 1152, 1091, 1018, 981, 891, 824, 696, 541, 513 cm<sup>-1</sup>; HRMS(ESI): calcd for C<sub>22</sub>H<sub>21</sub>NO<sub>3</sub>Cl (M+H<sup>+</sup>) 382.1210, found 382.1212.

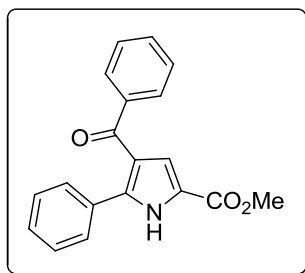

#### methyl 4-benzoyl-5-phenyl-1H-pyrrole-2-carboxylate (3ad)

white solid, 82% yield. mp: 157-158 °C. <sup>1</sup>H NMR (400 MHz, CDCl<sub>3</sub>) δ 9.99 (brs, 1H), 7.79 (d, *J* =

### Electronic Supplementary Material

7.1 Hz, 2H), 7.54-7.51 (m, 2H), 7.48 (t,  $J = 7.4$  Hz, 1H), 7.37 (t,  $J = 7.6$  Hz, 2H), 7.34-7.31 (m, 3H), 7.21 (d,  $J = 2.6$  Hz, 1H), 3.80 (s, 3H);  $^{13}\text{C}$  NMR (100 MHz,  $\text{CDCl}_3$ )  $\delta$  191.8, 161.7, 140.9, 138.9, 132.3, 130.8, 129.7, 129.1, 128.9, 128.5, 128.2, 122.0, 122.0, 119.7, 52.1; IR (KBr)  $\nu$  3269, 3057, 1692, 1651, 1562, 1460, 1426, 1260, 1210, 1003, 891, 775, 735, 697, 543  $\text{cm}^{-1}$ ; HRMS(ESI): calcd for  $\text{C}_{19}\text{H}_{16}\text{NO}_3$  ( $\text{M}+\text{H}^+$ ) 306.1130, found 306.1126.

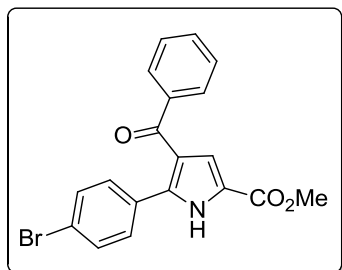

#### methyl 4-benzoyl-5-(4-bromophenyl)-1H-pyrrole-2-carboxylate (3ae)

white solid, 79% yield. mp: 200-202  $^{\circ}\text{C}$ .  $^1\text{H}$  NMR (400 MHz,  $\text{CDCl}_3$ )  $\delta$  10.15 (s, 1H), 7.80 (d,  $J = 7.1$  Hz, 2H), 7.53 (t,  $J = 7.4$  Hz, 1H), 7.48-7.38 (m, 6H), 7.19 (d,  $J = 2.5$  Hz, 1H), 3.80 (s, 3H);  $^{13}\text{C}$  NMR (100 MHz,  $\text{CDCl}_3$ )  $\delta$  191.6, 161.7, 139.7, 138.8, 132.5, 131.7, 130.4, 129.7, 129.7, 128.4, 123.5, 122.2, 122.1, 119.8, 52.1; IR (KBr)  $\nu$  3303, 3060, 2950, 1701, 1643, 1464, 1414, 1279, 1250, 1200, 1162, 1069, 1003, 892, 832, 742, 695, 597, 548, 492  $\text{cm}^{-1}$ ; HRMS(ESI): calcd for  $\text{C}_{19}\text{H}_{15}\text{NO}_3\text{Br}$  ( $\text{M}+\text{H}^+$ ) 384.0235, found 384.0235.

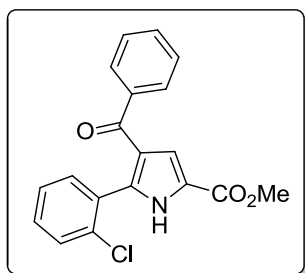

#### methyl 4-benzoyl-5-(2-chlorophenyl)-1H-pyrrole-2-carboxylate (3af)

white solid, 89% yield. mp: 183-185  $^{\circ}\text{C}$ .  $^1\text{H}$  NMR (400 MHz,  $\text{CDCl}_3$ )  $\delta$  10.20 (brs, 1H), 7.76 (d,  $J = 7.1$  Hz, 2H), 7.45 (t,  $J = 7.4$  Hz, 1H), 7.39-7.32 (m, 4H), 7.30-7.17 (m, 3H), 3.75 (s, 3H);  $^{13}\text{C}$  NMR (100 MHz,  $\text{CDCl}_3$ )  $\delta$  191.3, 161.7, 138.7, 137.4, 133.5, 132.2, 132.1, 130.4, 130.3, 129.9, 129.5, 128.1, 126.7, 123.9, 122.3, 118.3, 52.0; IR (KBr)  $\nu$  3243, 3022, 2953, 1691, 1655, 1564, 1460, 1345, 1284, 1260, 1213, 1167, 1071, 1002, 894, 852, 768, 735, 699, 557  $\text{cm}^{-1}$ ; HRMS(ESI): calcd for  $\text{C}_{19}\text{H}_{15}\text{NO}_3\text{Cl}$  ( $\text{M}+\text{H}^+$ ) 340.0740, found 340.0743.



### Electronic Supplementary Material

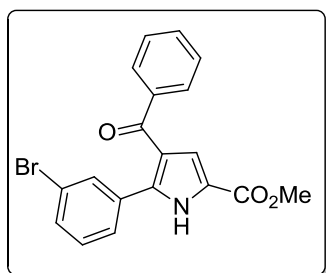

#### methyl 4-benzoyl-5-(3-bromophenyl)-1H-pyrrole-2-carboxylate (3ag)

white solid, 72% yield. mp: 220-221 °C.  $^1\text{H}$  NMR (400 MHz,  $\text{CDCl}_3$ )  $\delta$  10.30 (s, 1H), 7.79 (d,  $J$  = 7.1 Hz, 2H), 7.69-7.67 (m, 1H), 7.51 (t,  $J$  = 7.4 Hz, 1H), 7.49-7.43 (m, 2H), 7.40 (t,  $J$  = 7.6 Hz, 2H), 7.23-7.12 (m, 2H), 3.80 (s, 3H);  $^{13}\text{C}$  NMR (100 MHz,  $\text{CDCl}_3$ )  $\delta$  191.6, 161.7, 139.1, 138.8, 132.8, 132.4, 132.0, 131.6, 130.0, 129.7, 128.3, 127.8, 122.5, 122.4, 119.7, 52.2; IR (KBr)  $\nu$  3445, 3097, 2945, 1726, 1628, 1596, 1573, 1462, 1435, 1335, 1291, 1270, 1200, 1162, 1015, 896, 793, 734, 680, 591, 449  $\text{cm}^{-1}$ ; HRMS(ESI): calcd for  $\text{C}_{19}\text{H}_{15}\text{NO}_3\text{Br}$  ( $\text{M}+\text{H}^+$ ) 384.0235, found 384.0235.

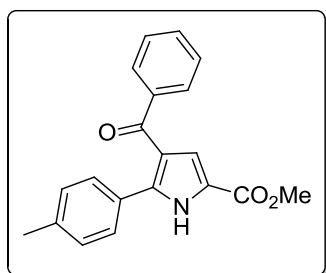

#### methyl 4-benzoyl-5-(p-tolyl)-1H-pyrrole-2-carboxylate (3ah)

white solid, 76% yield. mp: 184-185 °C.  $^1\text{H}$  NMR (400 MHz,  $\text{CDCl}_3$ )  $\delta$  9.84 (brs, 1H), 7.80 (d,  $J$  = 7.1 Hz, 2H), 7.49 (t,  $J$  = 7.4 Hz, 1H), 7.43 (d,  $J$  = 8.1 Hz), 7.38 (d,  $J$  = 7.6 Hz), 7.19 (d,  $J$  = 2.6 Hz, 1H), 7.14 (d,  $J$  = 7.8 Hz, 2H), 3.82 (s, 3H), 2.34 (s, 3H);  $^{13}\text{C}$  NMR (100 MHz,  $\text{CDCl}_3$ )  $\delta$  191.7, 161.7, 141.1, 139.2, 139.0, 132.2, 129.7, 129.3, 128.6, 128.2, 127.9, 121.7, 121.7, 119.8, 52.0, 21.4; IR (KBr)  $\nu$  3407, 3169, 2948, 1715, 1628, 1561, 1478, 1454, 1287, 1204, 1166, 1115, 1012, 892, 739, 701, 608, 538  $\text{cm}^{-1}$ ; HRMS(ESI): calcd for  $\text{C}_{20}\text{H}_{18}\text{NO}_3$  ( $\text{M}+\text{H}^+$ ) 320.1287, found 320.1286.

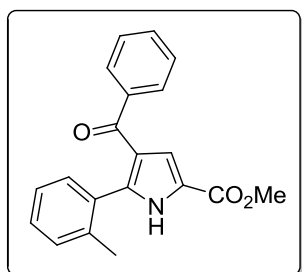

#### methyl 4-benzoyl-5-(o-tolyl)-1H-pyrrole-2-carboxylate (3ai)

white solid, 82% yield. mp: 217 °C.  $^1\text{H}$  NMR (400 MHz,  $\text{CDCl}_3$ )  $\delta$  10.04 (brs, 1H), 7.74 (d,  $J$  = 7.2 Hz, 2H), 7.46 (t,  $J$  = 7.4 Hz, 1H), 7.35 (t,  $J$  = 7.6 Hz, 2H), 7.32-7.24 (m, 3H), 7.23-7.15 (m,

### Electronic Supplementary Material

2H), 3.72 (d,  $J = 2.6$  Hz, 3H), 2.20 (s, 3H);  $^{13}\text{C}$  NMR (100 MHz,  $\text{CDCl}_3$ )  $\delta$  191.2, 161.8, 140.9, 138.9, 137.3, 132.0, 131.2, 130.3, 130.2, 129.4, 129.2, 128.1, 125.7, 123.2, 121.7, 118.5, 52.0, 20.0; IR (KBr)  $\nu$  3451, 3249, 2952, 1692, 1651, 1563, 1472, 1430, 1343, 1288, 1264, 1212, 1002, 893, 853, 803, 773, 738, 701, 451  $\text{cm}^{-1}$ ; HRMS(ESI): calcd for  $\text{C}_{20}\text{H}_{18}\text{NO}_3$  ( $\text{M}+\text{H}^+$ ) 320.1287, found 320.1284.

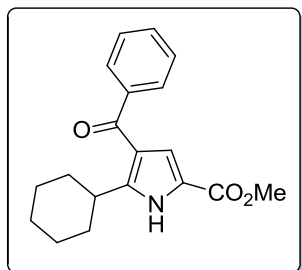

#### methyl 4-benzoyl-5-cyclohexyl-1H-pyrrole-2-carboxylate (3aj)

white solid, 31% yield. mp: 168-171  $^{\circ}\text{C}$ .  $^1\text{H}$  NMR (400 MHz,  $\text{CDCl}_3$ )  $\delta$  9.32 (brs, 1H), 7.79 (d,  $J = 7.0$  Hz, 2H), 7.54 (t,  $J = 7.3$  Hz, 1H), 7.46 (t,  $J = 7.4$  Hz, 2H), 7.06 (d,  $J = 2.4$  Hz, 1H), 3.85 (s, 3H), 3.51 (tt,  $J = 11.6, 11.6, 3.1, 3.1$  Hz, 1H), 2.07 (d,  $J = 11.0$  Hz, 2H), 1.85 (d,  $J = 12.5$  Hz, 2H), 1.78 (d,  $J = 13.3$  Hz, 1H), 1.54-1.34 (m, 4H), 1.32-1.20 (m, 1H);  $^{13}\text{C}$  NMR (100 MHz,  $\text{CDCl}_3$ )  $\delta$  192.0, 161.5, 149.7, 140.1, 131.8, 129.2, 128.3, 120.3, 120.0, 119.3, 51.8, 36.3, 32.4, 26.5, 26.1; IR (KBr)  $\nu$  3301, 2921, 2851, 1691, 1639, 1560, 1495, 1456, 1377, 1265, 1203, 1101, 1014, 908, 801, 732, 698, 669, 630, 514  $\text{cm}^{-1}$ ; HRMS(ESI): calcd for  $\text{C}_{19}\text{H}_{22}\text{NO}_3$  ( $\text{M}+\text{H}^+$ ) 312.1600, found 312.1599.

#### References

1. V. S. Aulakh and M. A. Ciufolini, *J. Org. Chem.*, 2009, **74**, 5750.
2. Y. Shen, S. Cai, C. He, X. Lin, P. Lu and Y. Wang, *Tetrahedron*, 2011, **67**, 8338.

## Electronic Supplementary Material

### X-ray crystal structure of 3aa

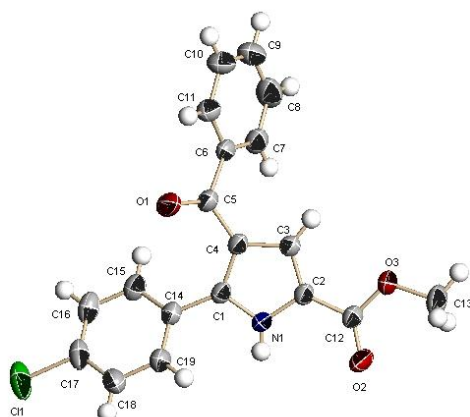

**Fig 1. X-ray crystal structure of 3aa (the ORTEP plot is shown at the 30 percent probability level)**

#### Crystal data for 3aa:

(CCDC 918358 contains the supplementary crystallographic data for this paper. These data can be obtained free of charge *via* [www.ccdc.cam.ac.uk/conts/retrieving.html](http://www.ccdc.cam.ac.uk/conts/retrieving.html).)

|                                   |                                                                                                                                                                                     |
|-----------------------------------|-------------------------------------------------------------------------------------------------------------------------------------------------------------------------------------|
| Empirical formula                 | $C_{19}H_{14}ClNO_3$                                                                                                                                                                |
| Formula weight                    | 339.76                                                                                                                                                                              |
| Temperature                       | 293(2) K                                                                                                                                                                            |
| Wavelength                        | 0.71073 Å                                                                                                                                                                           |
| Crystal system, space group       | Monoclinic, P2 (1) / c                                                                                                                                                              |
| Unit cell dimensions              | $a = 12.9597 (11) \text{ Å}$ $\alpha = 90 \text{ deg.}$<br>$b = 9.6741 (8) \text{ Å}$ $\beta = 100.796 (2) \text{ deg.}$<br>$c = 13.3527 (11) \text{ Å}$ $\gamma = 90 \text{ deg.}$ |
| Volume                            | $1644.4 (2) \text{ Å}^3$                                                                                                                                                            |
| Z, Calculated density             | 4, 1.372 Mg/m <sup>3</sup>                                                                                                                                                          |
| Absorption coefficient            | $0.249 \text{ mm}^{-1}$                                                                                                                                                             |
| F(000)                            | 704                                                                                                                                                                                 |
| Crystal size                      | 0.287 x 0.211 x 0.143 mm                                                                                                                                                            |
| Theta range for data collection   | 2.62 to 26.00 deg.                                                                                                                                                                  |
| Limiting indices                  | $-15 \leq h \leq 15$ , $-6 \leq k \leq 11$ , $-14 \leq l \leq 16$                                                                                                                   |
| Reflections collected / unique    | 9581 / 3225 [R (int) = 0.0244]                                                                                                                                                      |
| Completeness to theta = 26.00     | 100.0 %                                                                                                                                                                             |
| Absorption correction             | Empirical                                                                                                                                                                           |
| Max. and min. transmission        | 1.00000 and 0.72019                                                                                                                                                                 |
| Refinement method                 | Full-matrix least-squares on F <sup>2</sup>                                                                                                                                         |
| Data / restraints / parameters    | 3225 / 0 / 223                                                                                                                                                                      |
| Goodness-of-fit on F <sup>2</sup> | 1.027                                                                                                                                                                               |
| Final R indices [I > 2 sigma(I)]  | R1 = 0.0401, wR2 = 0.1026                                                                                                                                                           |
| R indices (all data)              | R1 = 0.0495, wR2 = 0.1103                                                                                                                                                           |
| Largest diff. peak and hole       | 0.211 and -0.232 e.Å <sup>-3</sup>                                                                                                                                                  |

### Electronic Supplementary Material

## $^1\text{H}$ NMR and $^{13}\text{C}$ NMR spectra

methyl 4-benzoyl-5-(4-chlorophenyl)-1H-pyrrole-2-carboxylate (3aa)

$^1\text{H}$  NMR (400 MHz,  $\text{CDCl}_3$ )

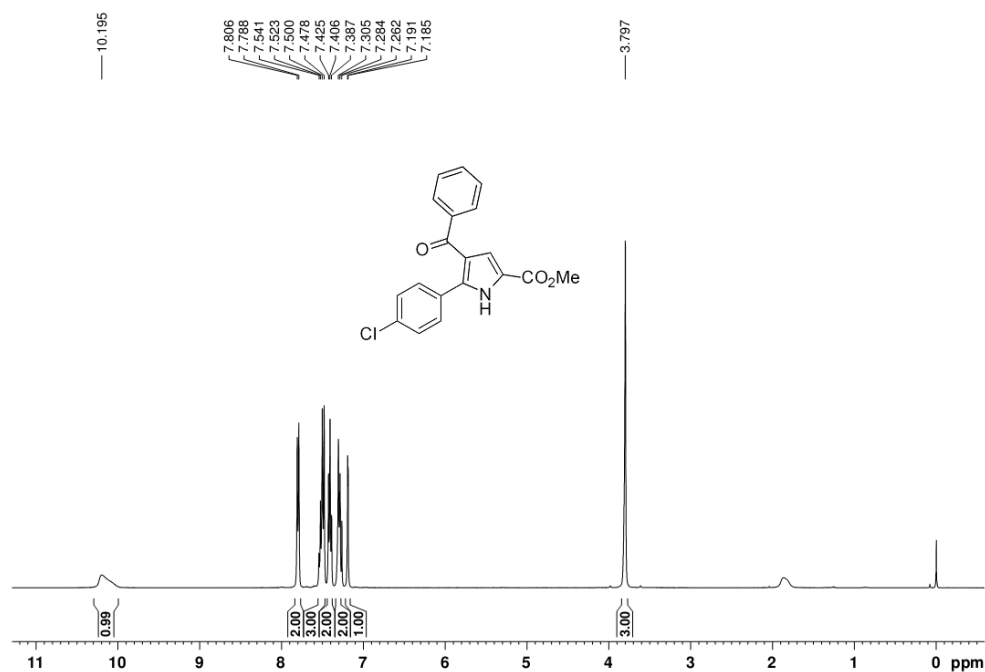

$^{13}\text{C}$  NMR (100 MHz,  $\text{CDCl}_3$ )

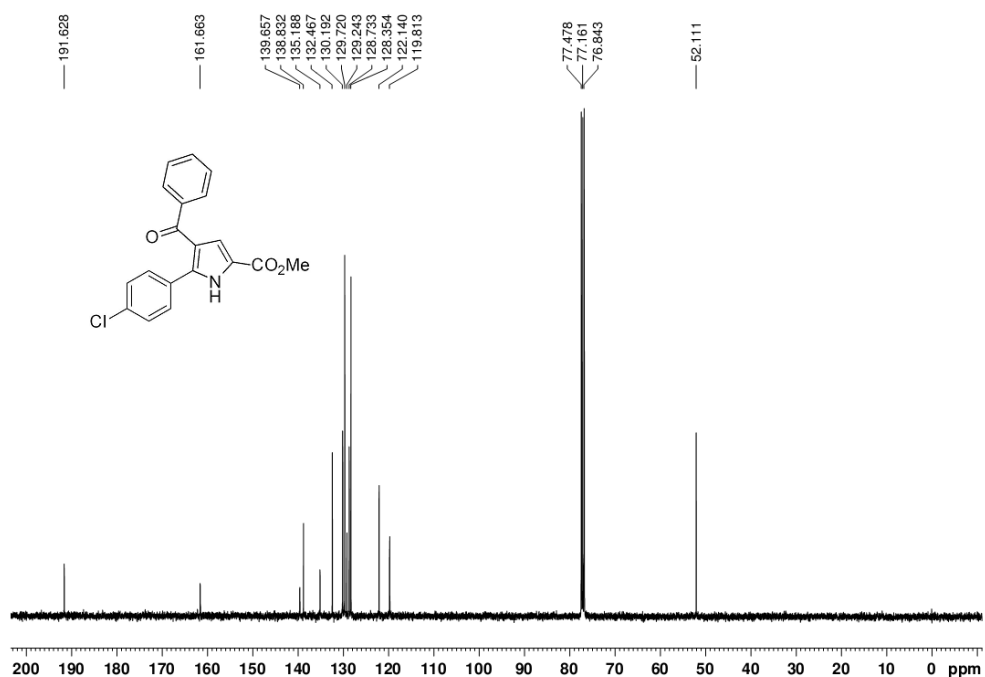

### Electronic Supplementary Material

#### methyl 4-(4-chlorobenzoyl)-5-(4-chlorophenyl)-1H-pyrrole-2-carboxylate (3ba)

$^1\text{H}$  NMR (400 MHz,  $\text{DMSO-}d_6$ )

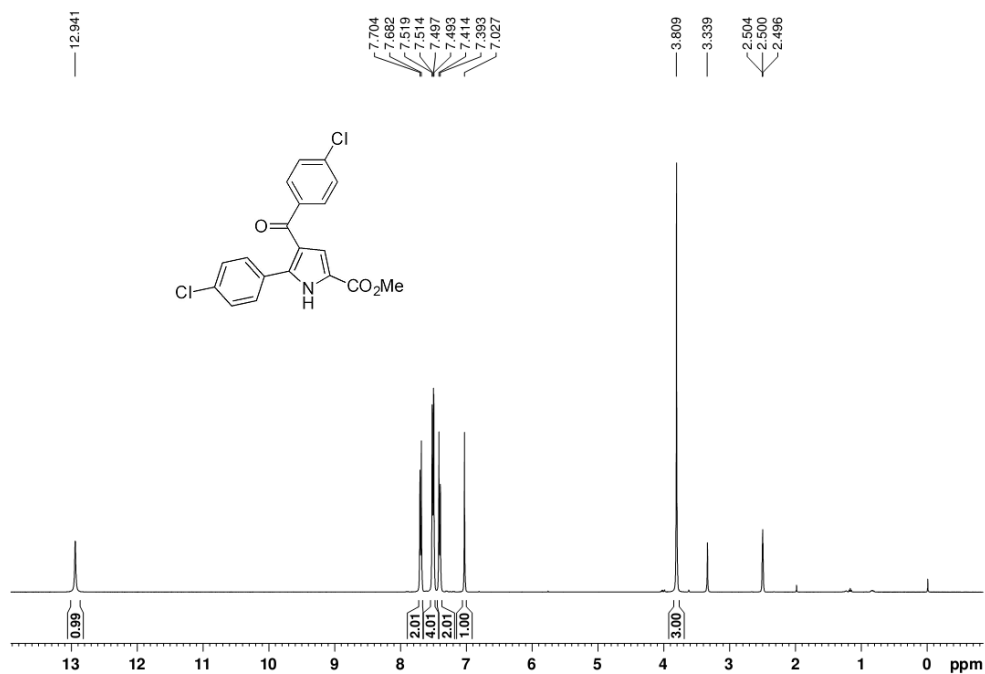

$^{13}\text{C}$  NMR (100 MHz,  $\text{DMSO-}d_6$ )

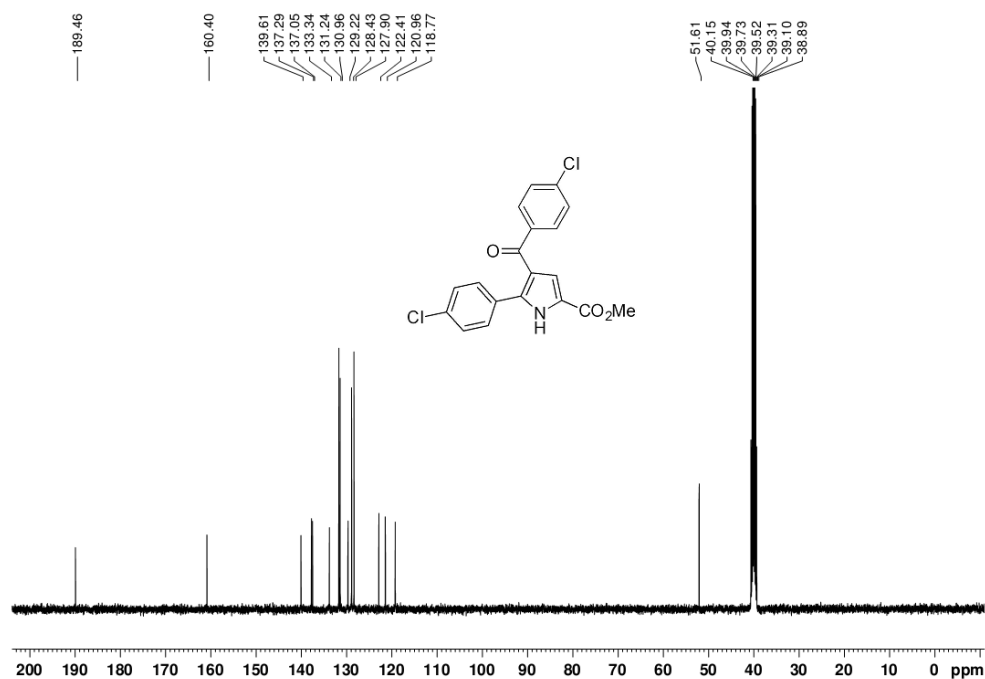

### Electronic Supplementary Material

#### methyl 5-(4-chlorophenyl)-4-(4-nitrobenzoyl)-1H-pyrrole-2-carboxylate (3ca)

$^1\text{H}$  NMR (400 MHz,  $\text{DMSO-}d_6$ )

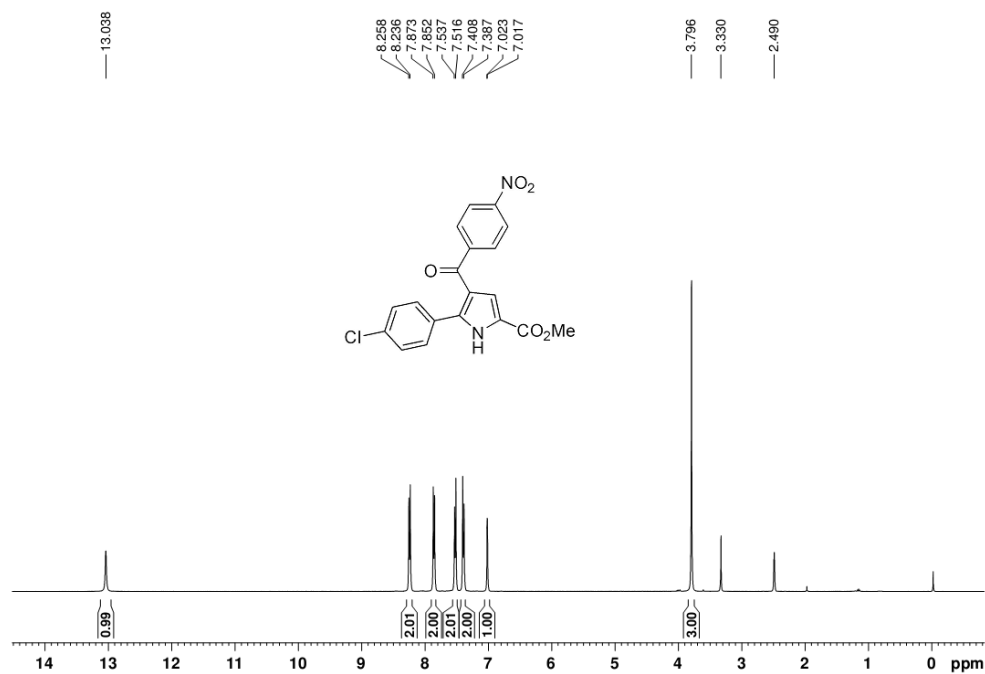

$^{13}\text{C}$  NMR (100 MHz,  $\text{DMSO-}d_6$ )

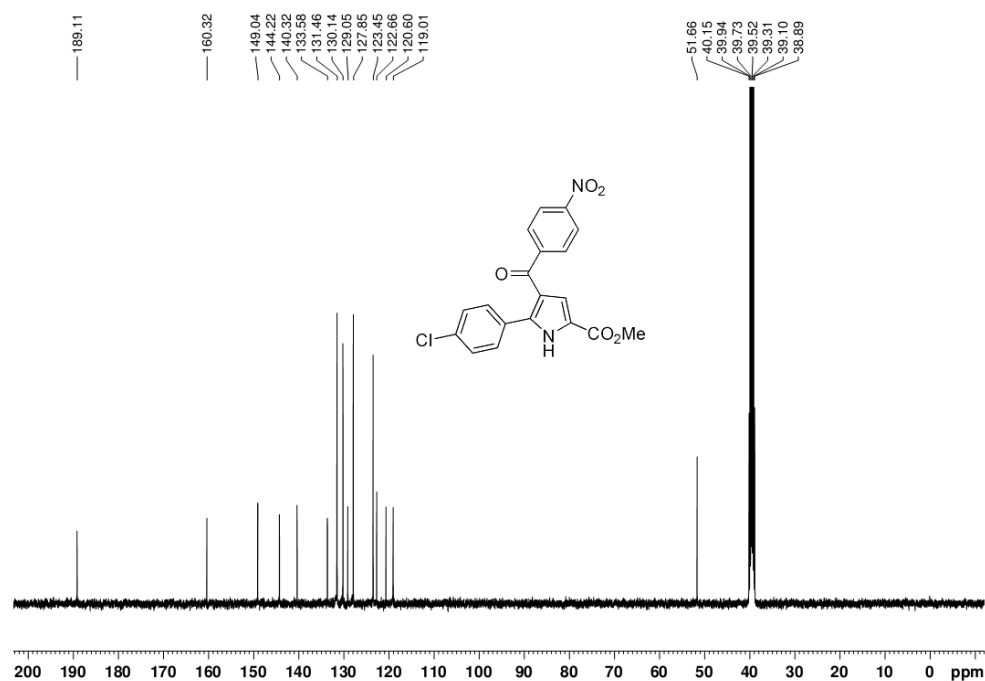

### Electronic Supplementary Material

#### methyl 4-(3-bromobenzoyl)-5-(4-chlorophenyl)-1H-pyrrole-2-carboxylate (3da)

$^1\text{H}$  NMR (400 MHz, DMSO- $d_6$ )

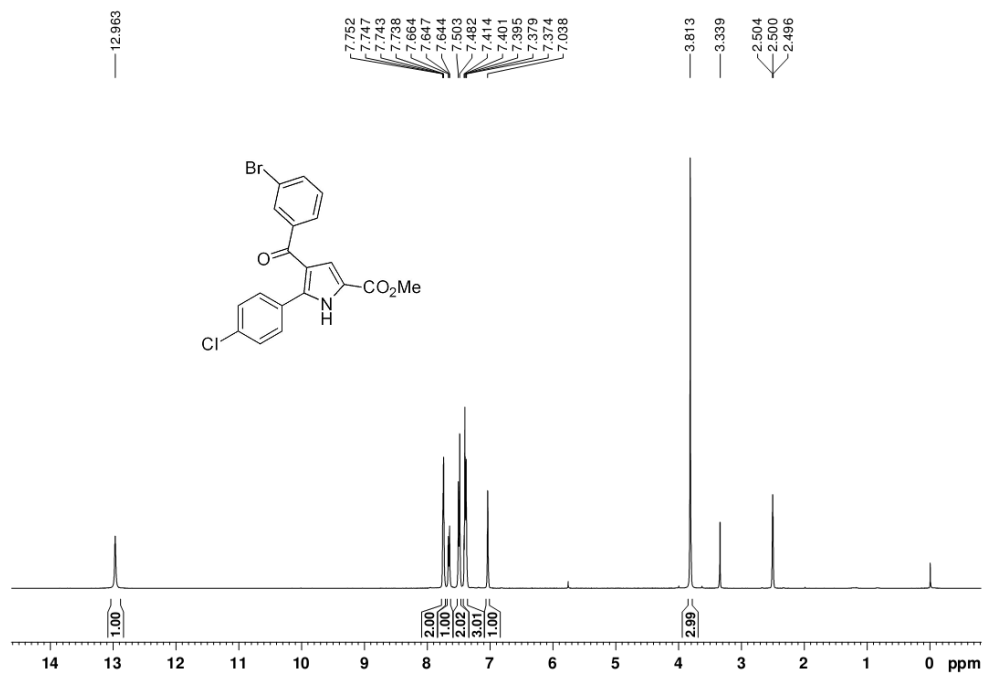

$^{13}\text{C}$  NMR (100 MHz, DMSO- $d_6$ )

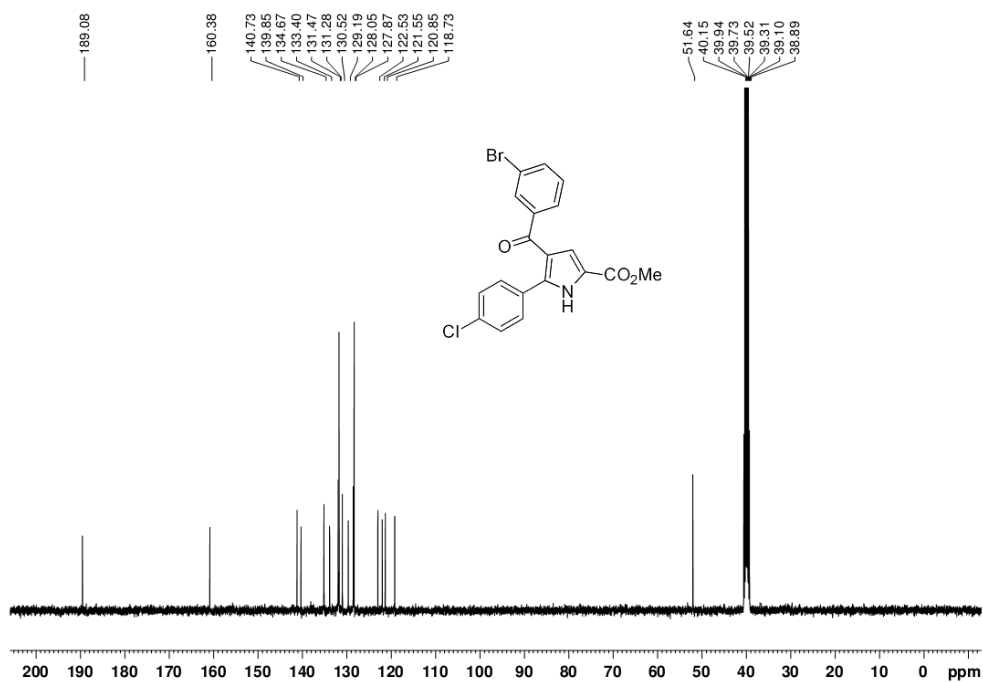

### Electronic Supplementary Material

#### methyl 5-(4-chlorophenyl)-4-(2-fluorobenzoyl)-1H-pyrrole-2-carboxylate (3ea)

$^1\text{H}$  NMR (400 MHz,  $\text{DMSO-}d_6$ )

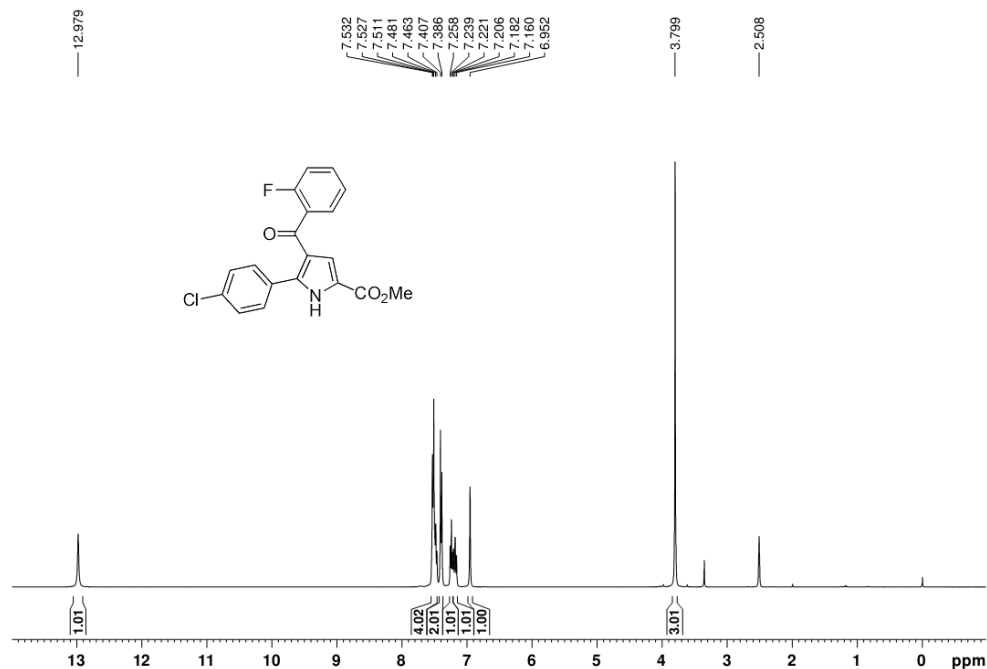

$^{13}\text{C}$  NMR (100 MHz,  $\text{DMSO-}d_6$ )

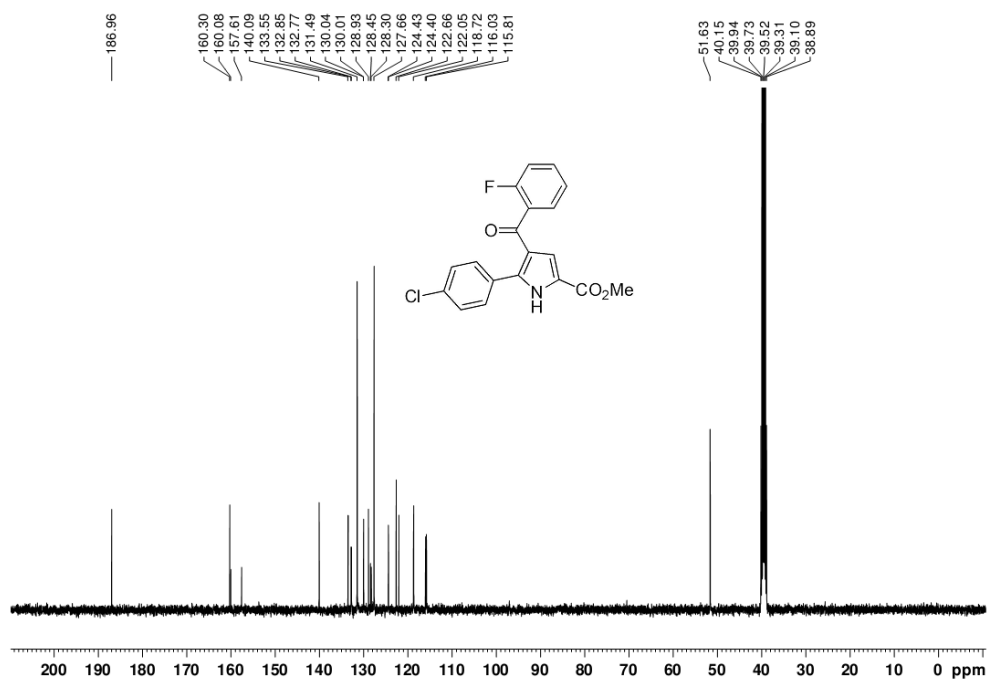



### Electronic Supplementary Material

#### methyl 5-(4-chlorophenyl)-4-(2-methylbenzoyl)-1H-pyrrole-2-carboxylate (3fa)

$^1\text{H}$  NMR (400 MHz,  $\text{DMSO-}d_6$ )

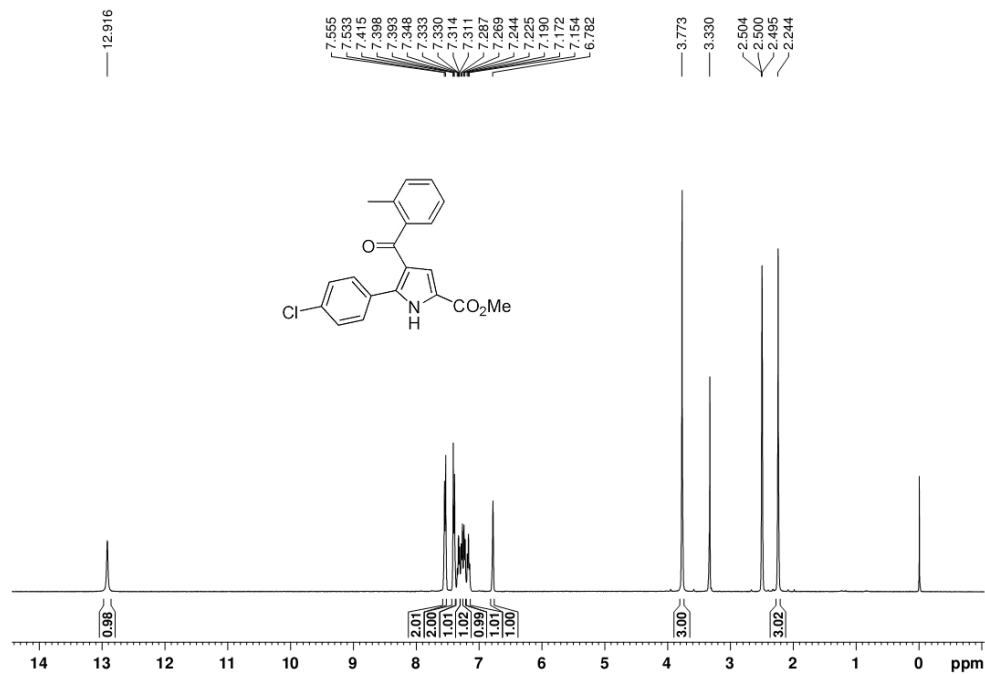

$^{13}\text{C}$  NMR (100 MHz,  $\text{DMSO-}d_6$ )

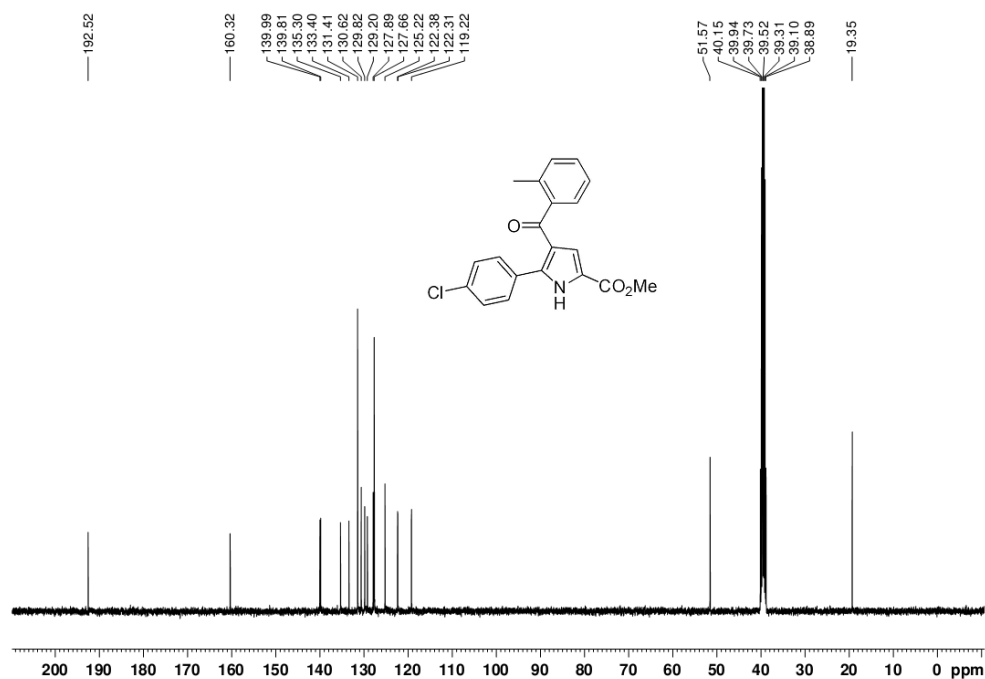

### Electronic Supplementary Material

#### methyl 5-(4-chlorophenyl)-4-(2,4-dimethylbenzoyl)-1H-pyrrole-2-carboxylate (3ga)

$^1\text{H}$  NMR (400 MHz,  $\text{DMSO-}d_6$ )

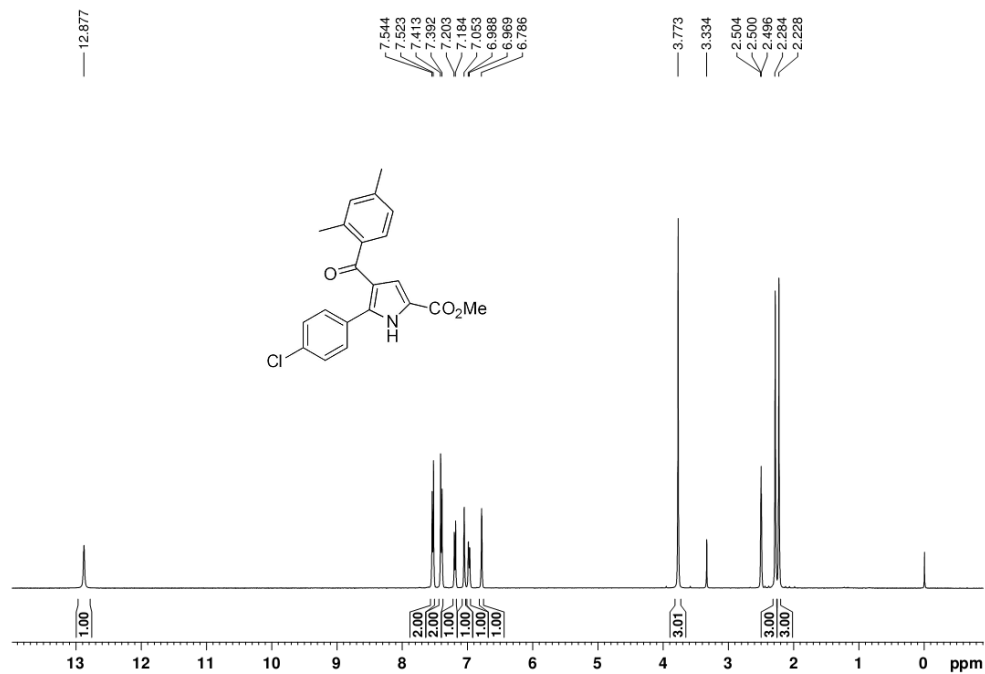

$^{13}\text{C}$  NMR (100 MHz,  $\text{DMSO-}d_6$ )

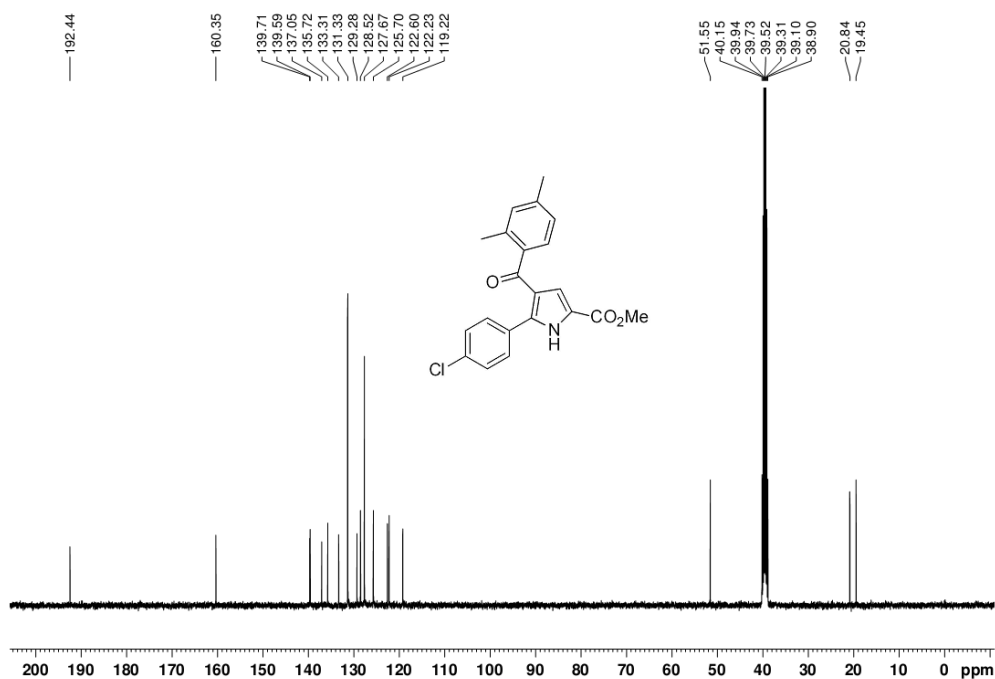

### Electronic Supplementary Material

#### methyl 5-(4-chlorophenyl)-4-(4-methoxybenzoyl)-1H-pyrrole-2-carboxylate (3ha)

$^1\text{H}$  NMR (400 MHz,  $\text{CDCl}_3$ )

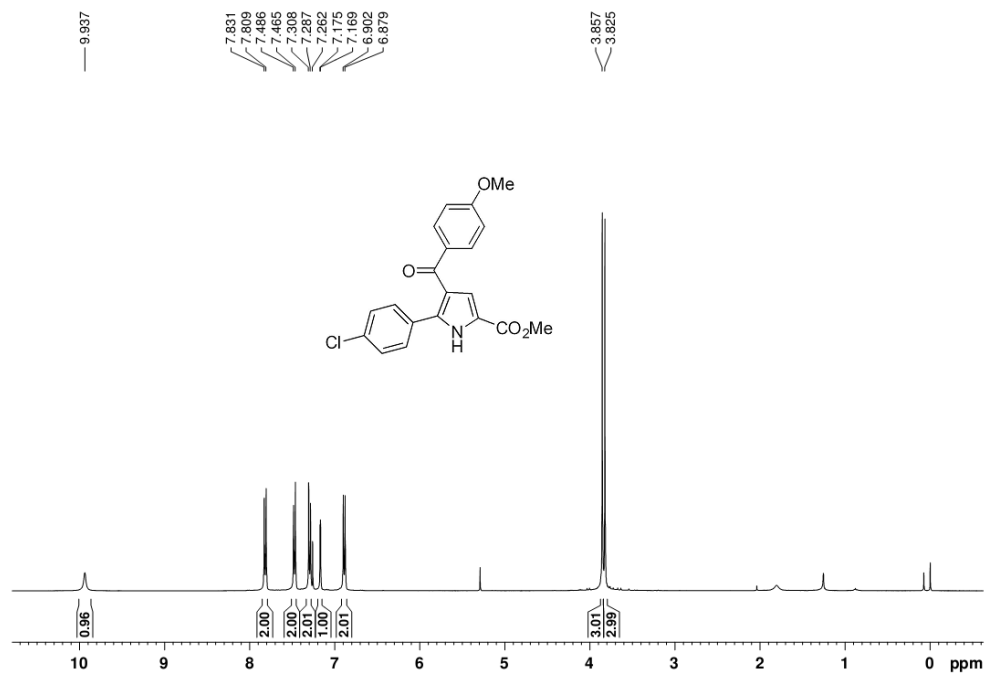

$^{13}\text{C}$  NMR (100 MHz,  $\text{CDCl}_3$ )

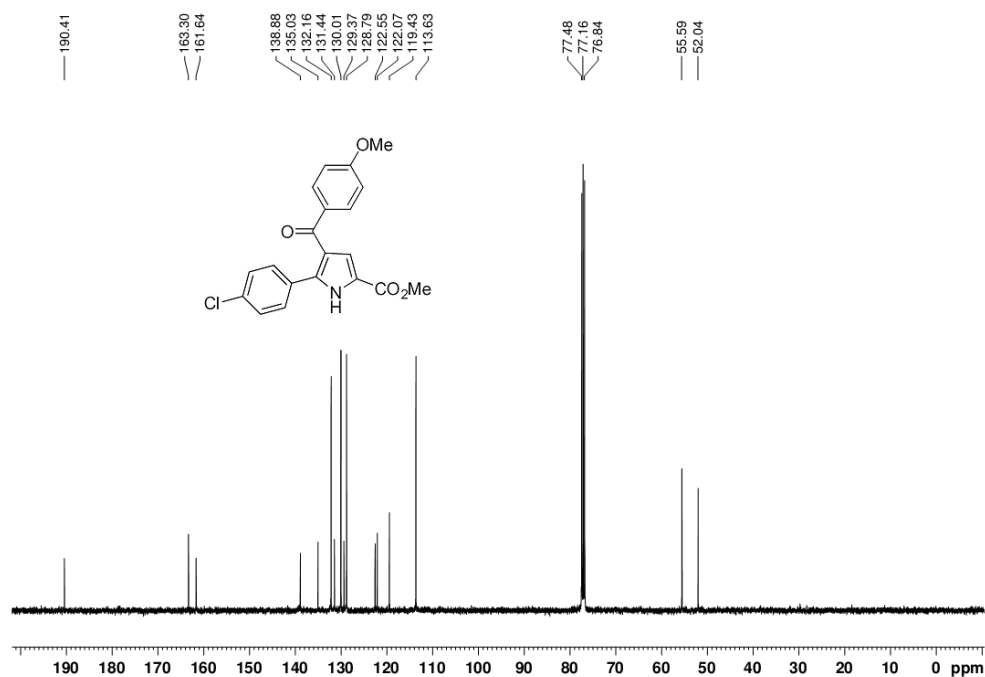

### Electronic Supplementary Material

#### methyl 5-(4-chlorophenyl)-4-(4-methylbenzoyl)-1H-pyrrole-2-carboxylate (3ia)

$^1\text{H}$  NMR (400 MHz,  $\text{DMSO-}d_6$ )

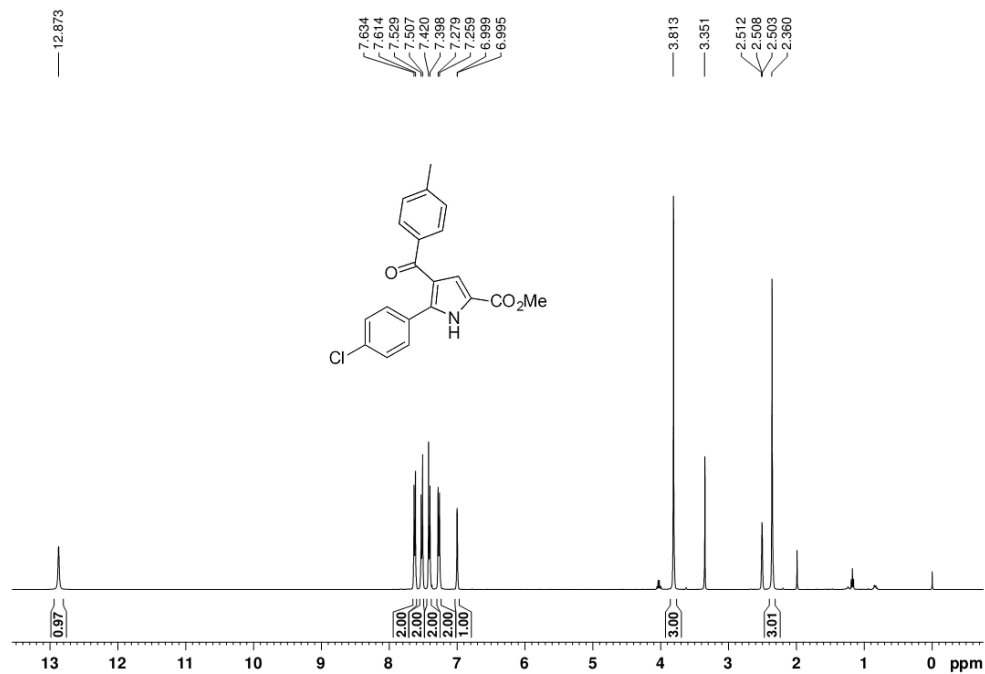

$^{13}\text{C}$  NMR (100 MHz,  $\text{DMSO-}d_6$ )

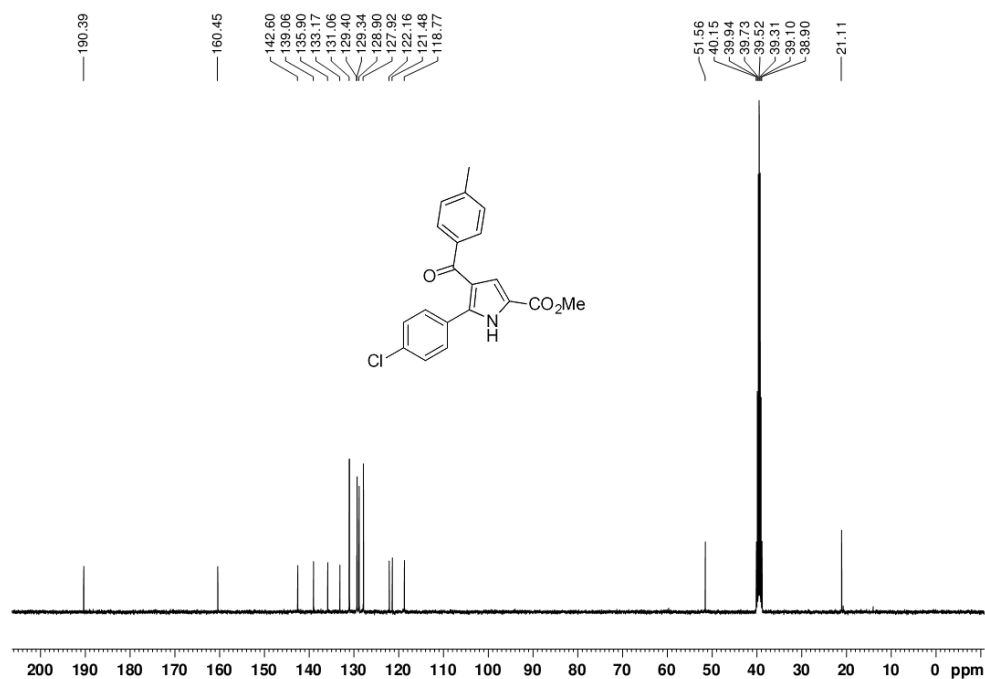

### Electronic Supplementary Material

#### methyl 5-(4-chlorophenyl)-4-(furan-2-carbonyl)-1H-pyrrole-2-carboxylate (3ja)

$^1\text{H}$  NMR (400 MHz,  $\text{CDCl}_3$ )

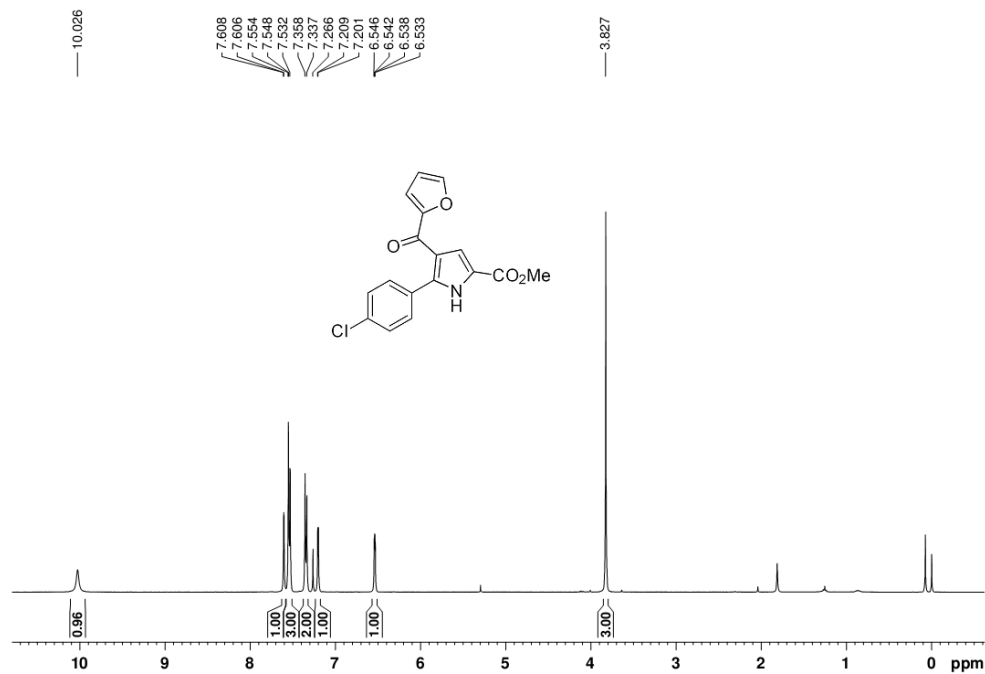

$^{13}\text{C}$  NMR (100 MHz,  $\text{CDCl}_3$ )

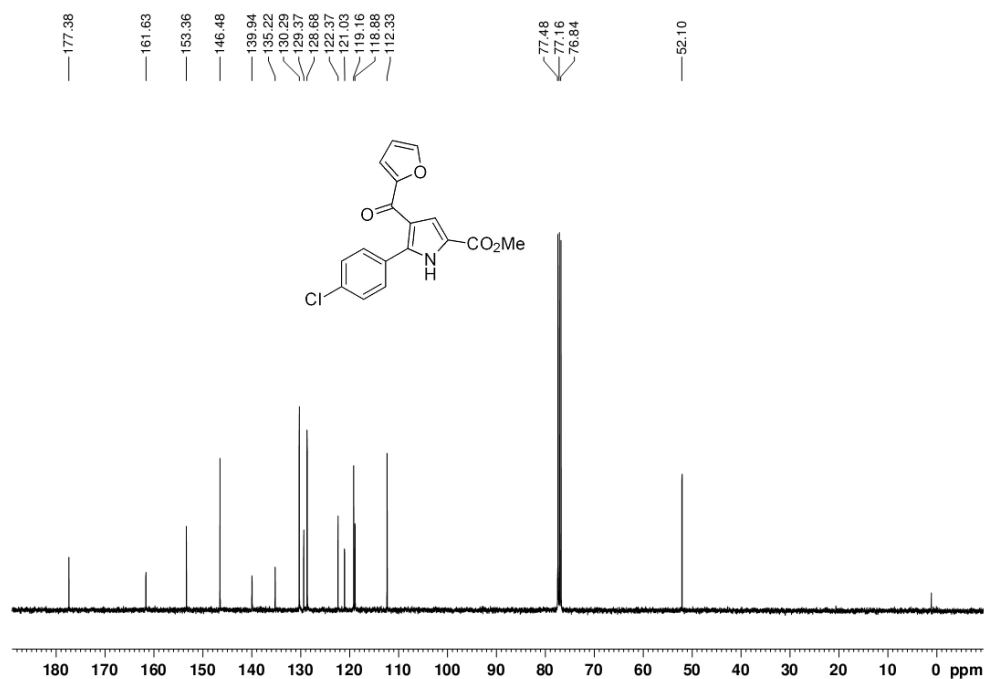

### Electronic Supplementary Material

#### ethyl 4-benzoyl-5-(4-chlorophenyl)-1H-pyrrole-2-carboxylate (3ab)

$^1\text{H}$  NMR (400 MHz,  $\text{CDCl}_3$ )

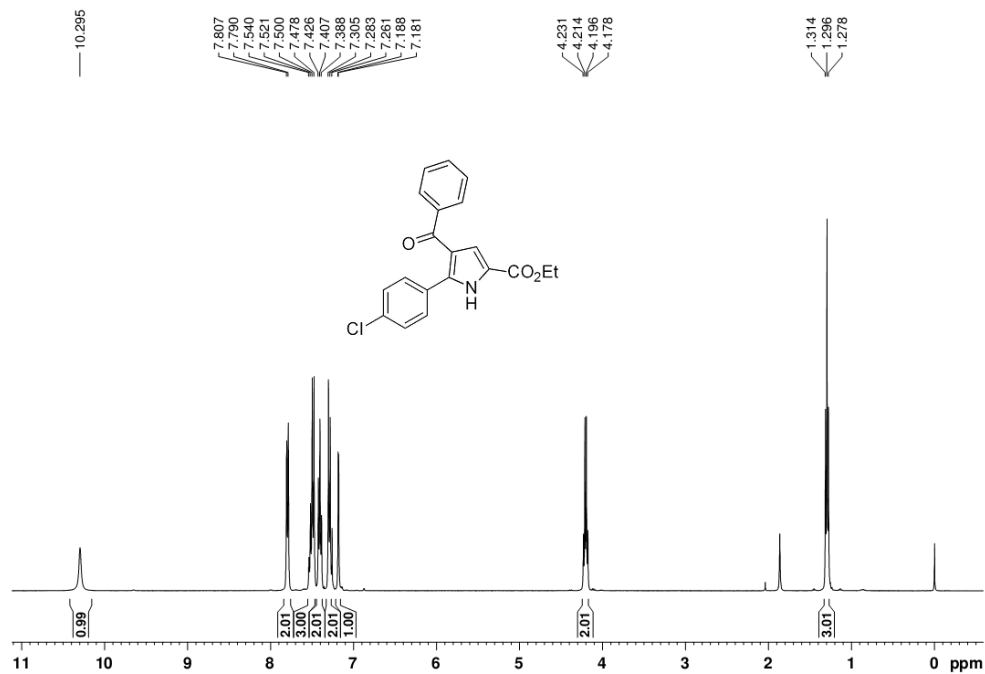

$^{13}\text{C}$  NMR (100 MHz,  $\text{CDCl}_3$ )

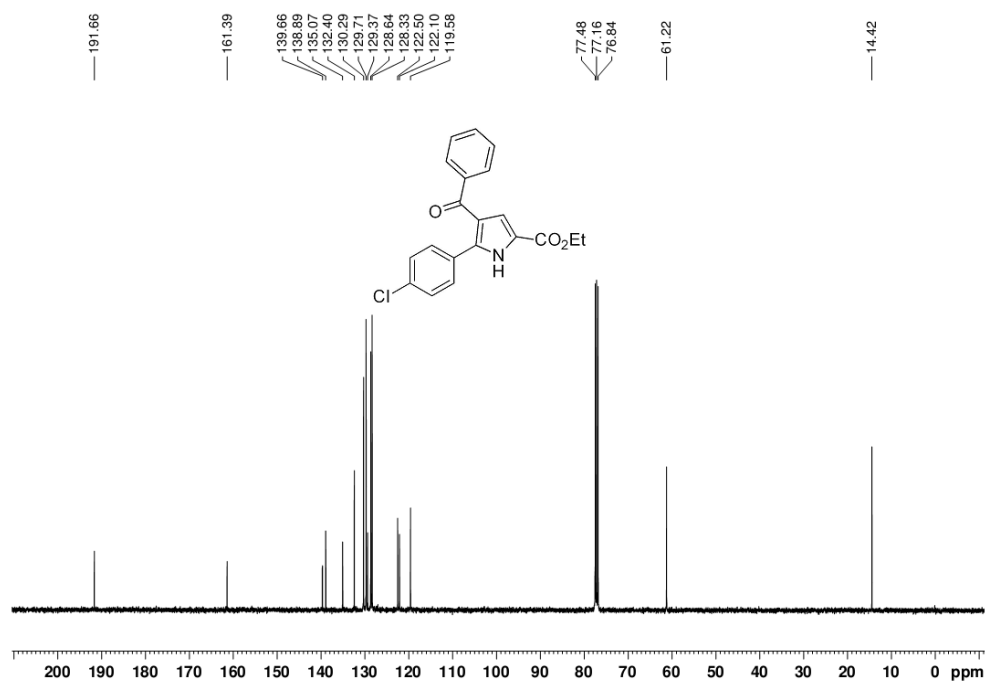

### Electronic Supplementary Material

#### *tert*-butyl 4-benzoyl-5-(4-chlorophenyl)-1H-pyrrole-2-carboxylate (3ac)

<sup>1</sup>H NMR (400 MHz, CDCl<sub>3</sub>)

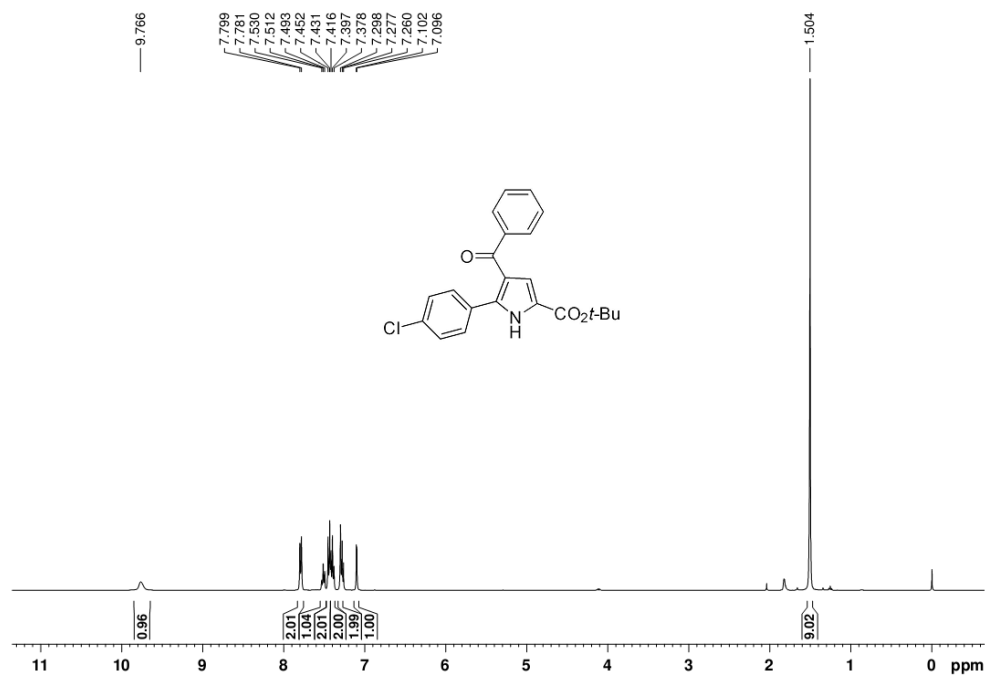

<sup>13</sup>C NMR (100 MHz, CDCl<sub>3</sub>)

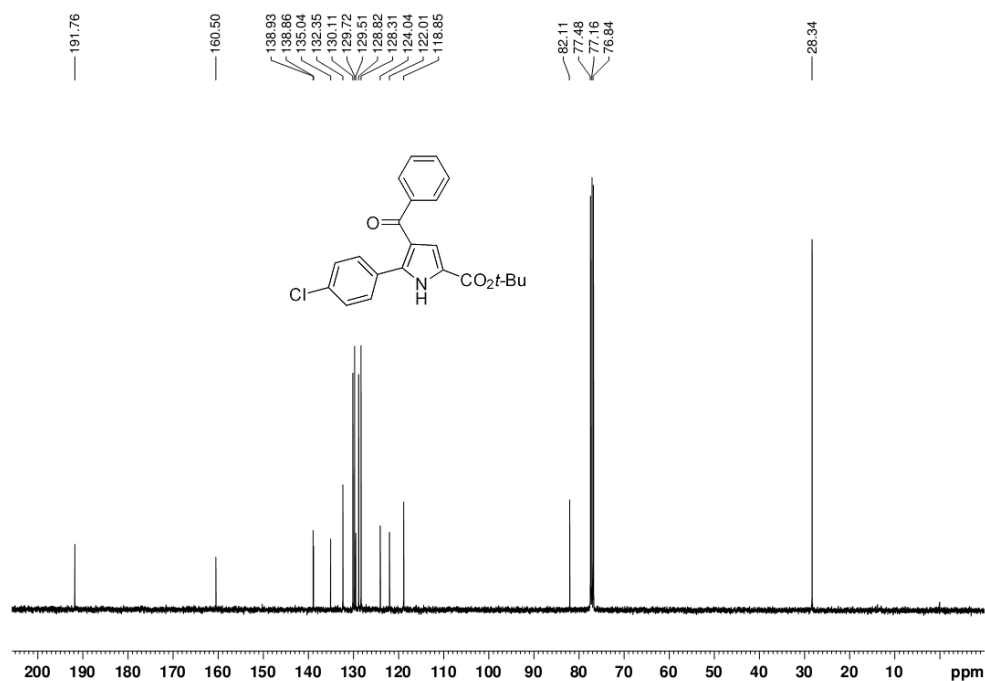

### Electronic Supplementary Material

#### methyl 4-benzoyl-5-phenyl-1H-pyrrole-2-carboxylate (3ad)

$^1\text{H}$  NMR (400 MHz,  $\text{CDCl}_3$ )

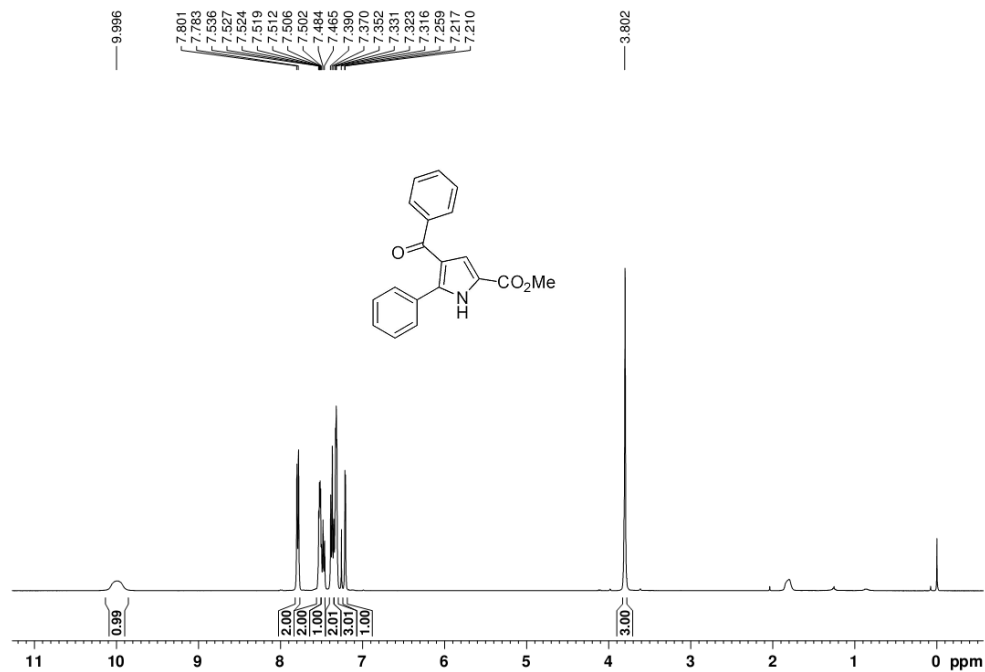

$^{13}\text{C}$  NMR (100 MHz,  $\text{CDCl}_3$ )

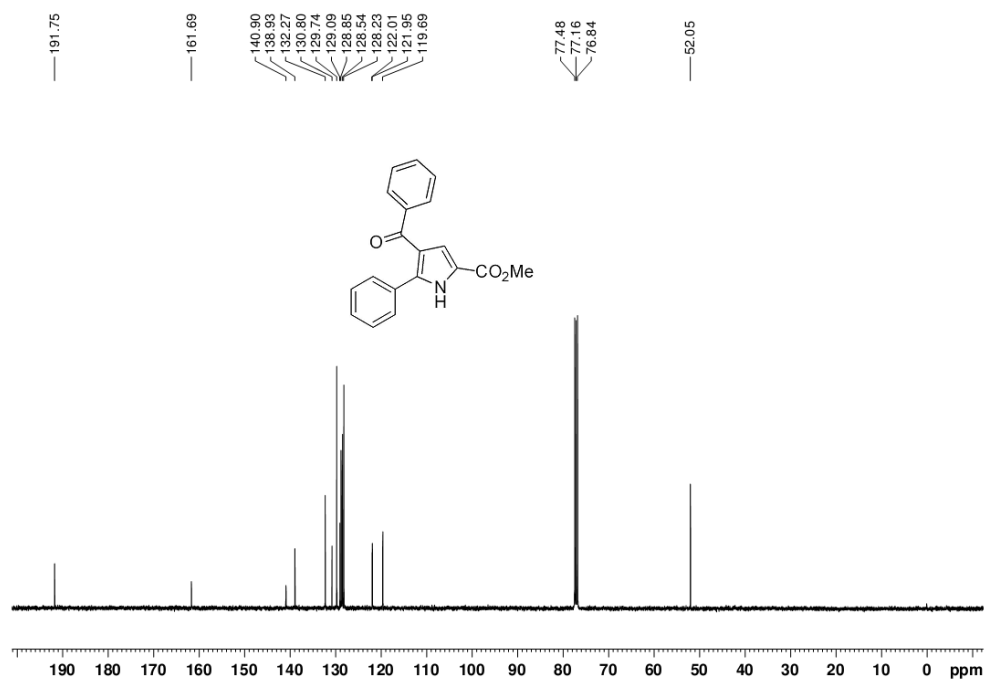



### Electronic Supplementary Material

#### methyl 4-benzoyl-5-(4-bromophenyl)-1H-pyrrole-2-carboxylate (3ae)

$^1\text{H}$  NMR (400 MHz,  $\text{CDCl}_3$ )

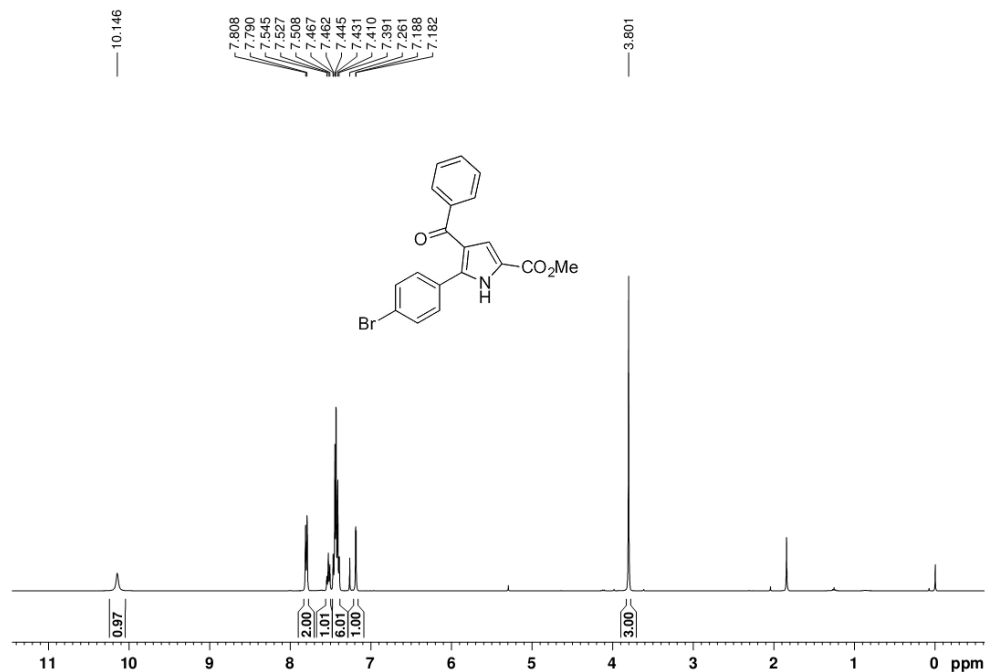

$^{13}\text{C}$  NMR (100 MHz,  $\text{CDCl}_3$ )

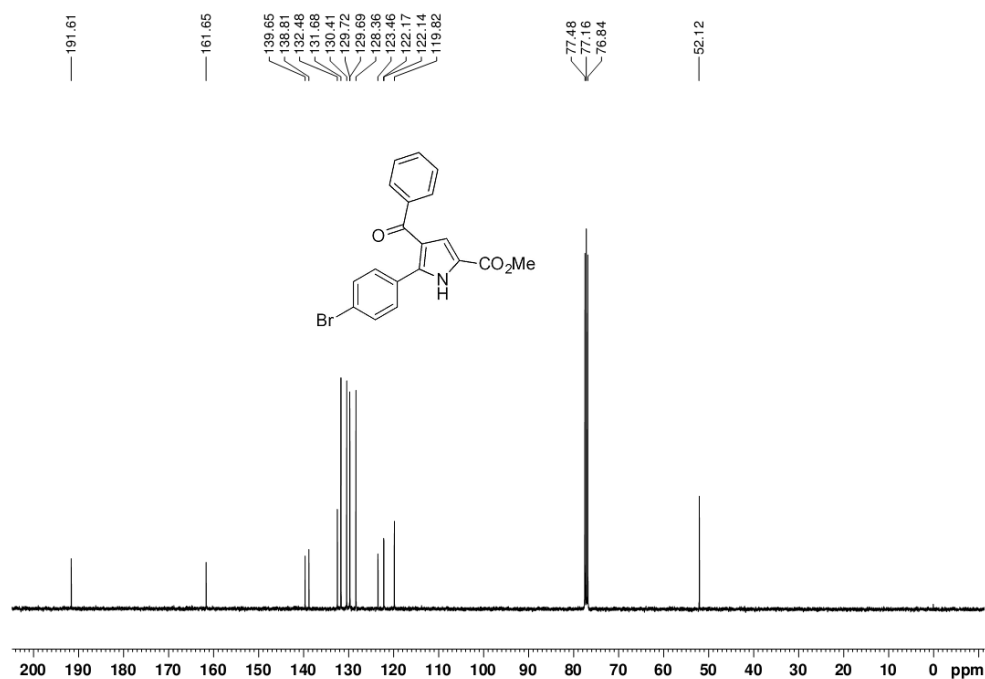

### Electronic Supplementary Material

#### methyl 4-benzoyl-5-(2-chlorophenyl)-1H-pyrrole-2-carboxylate (3af)

$^1\text{H}$  NMR (400 MHz,  $\text{CDCl}_3$ )

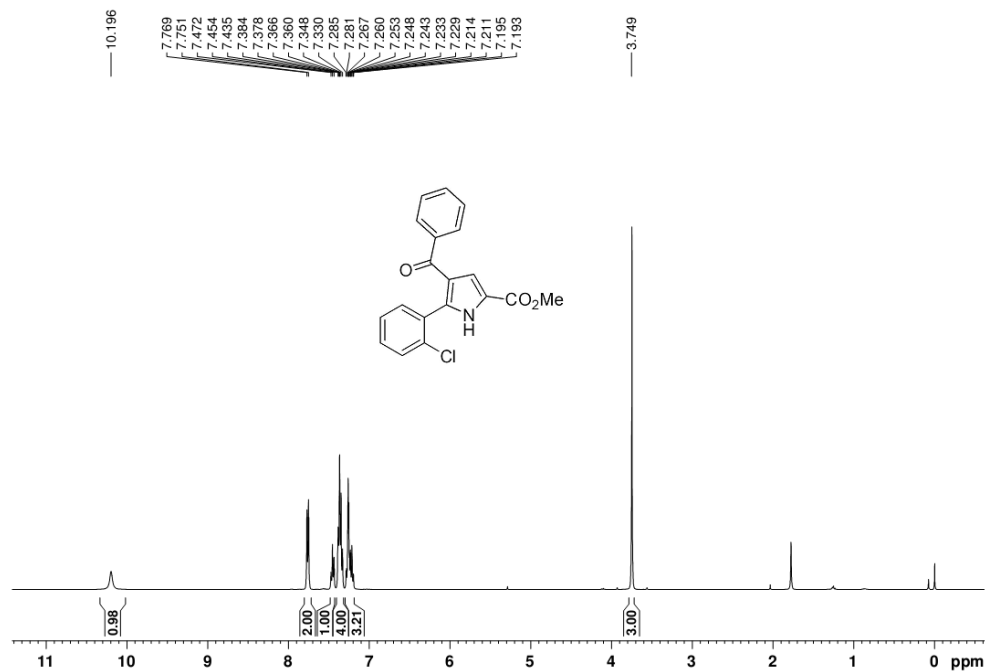

$^{13}\text{C}$  NMR (100 MHz,  $\text{CDCl}_3$ )

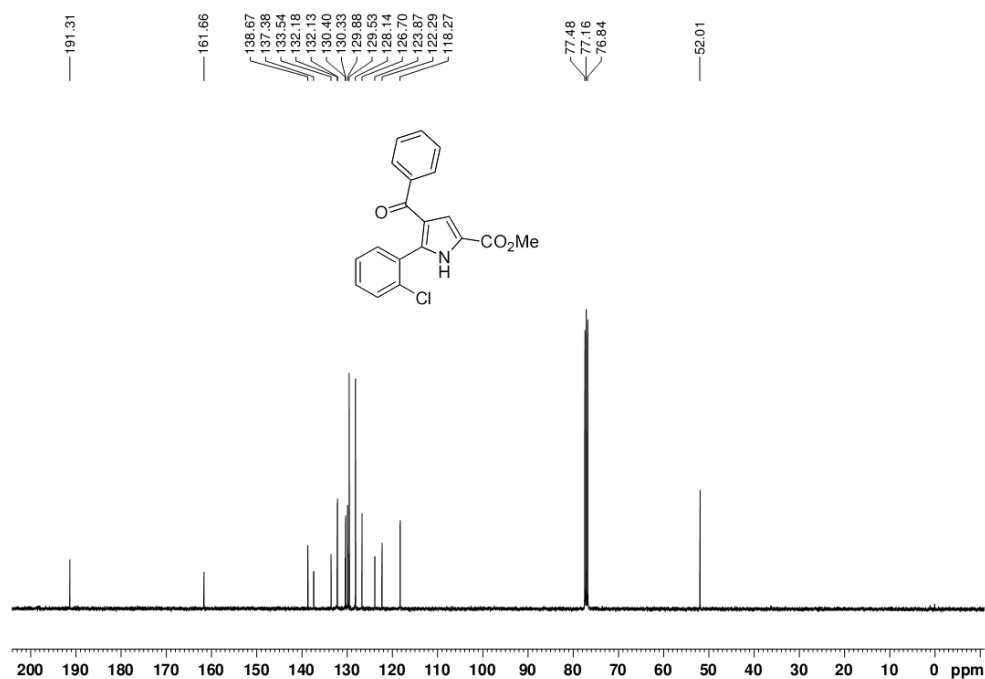

### Electronic Supplementary Material

#### methyl 4-benzoyl-5-(3-bromophenyl)-1H-pyrrole-2-carboxylate (3ag)

$^1\text{H}$  NMR (400 MHz,  $\text{CDCl}_3$ )

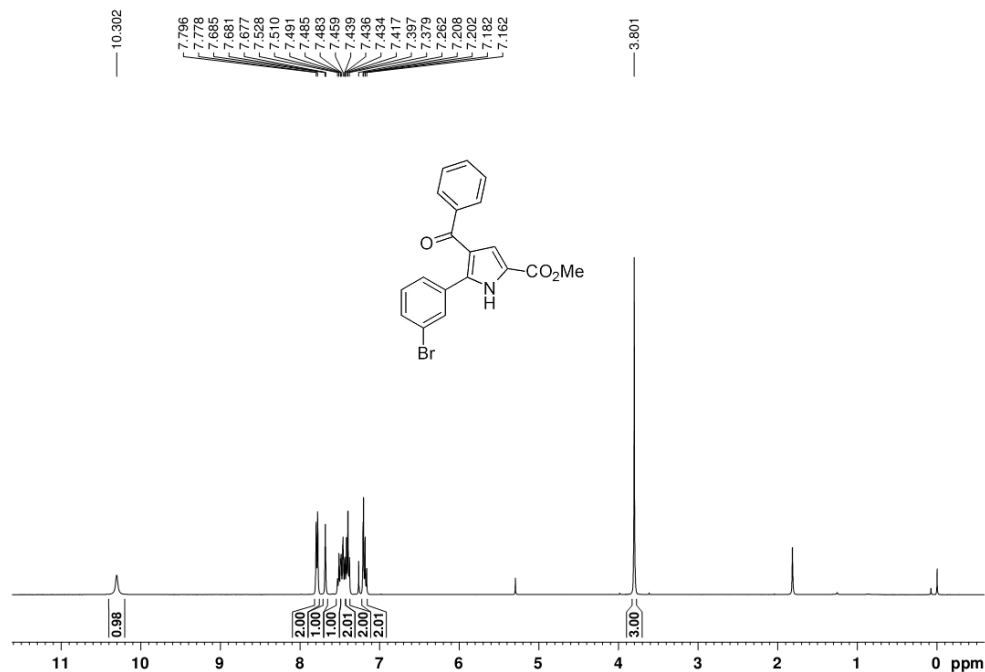

$^{13}\text{C}$  NMR (100 MHz,  $\text{CDCl}_3$ )

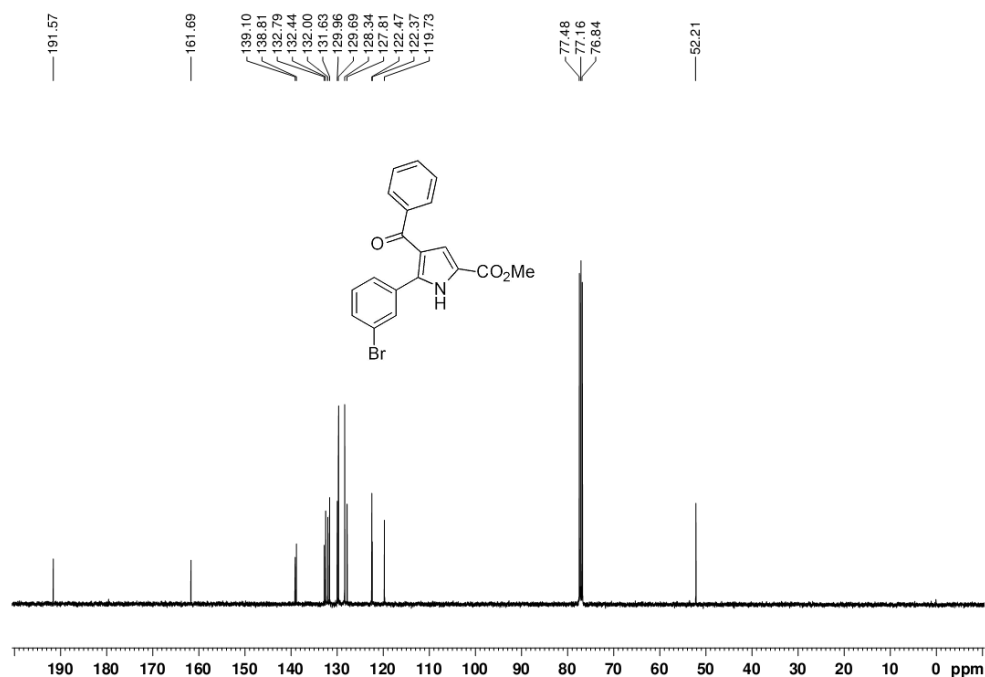

### Electronic Supplementary Material

#### methyl 4-benzoyl-5-(*p*-tolyl)-1H-pyrrole-2-carboxylate (3ah)

$^1\text{H}$  NMR (400 MHz,  $\text{CDCl}_3$ )

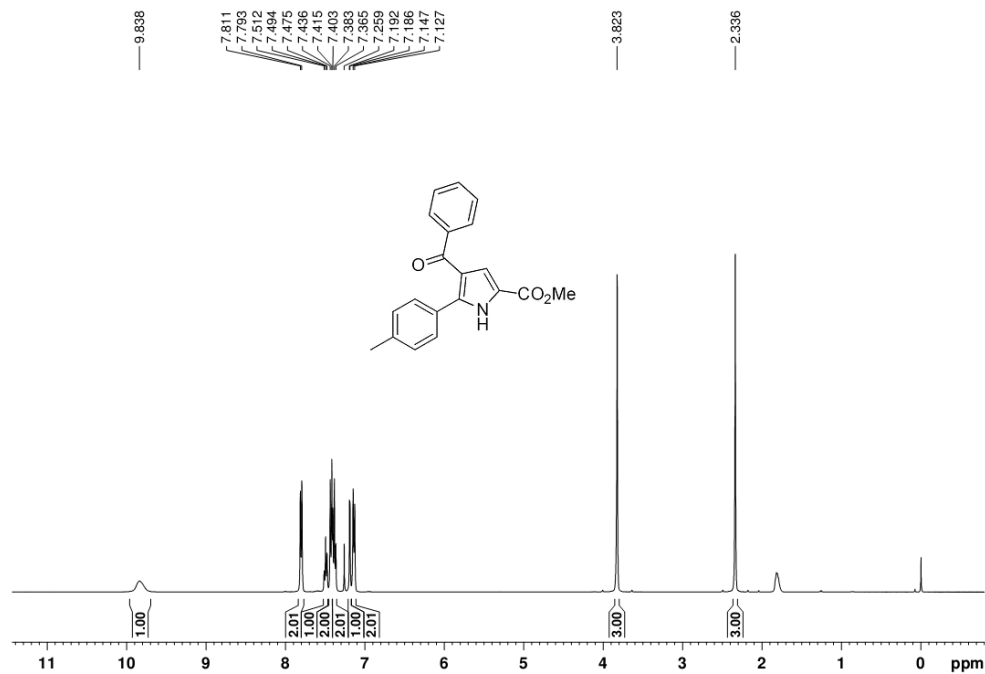

$^{13}\text{C}$  NMR (100 MHz,  $\text{CDCl}_3$ )

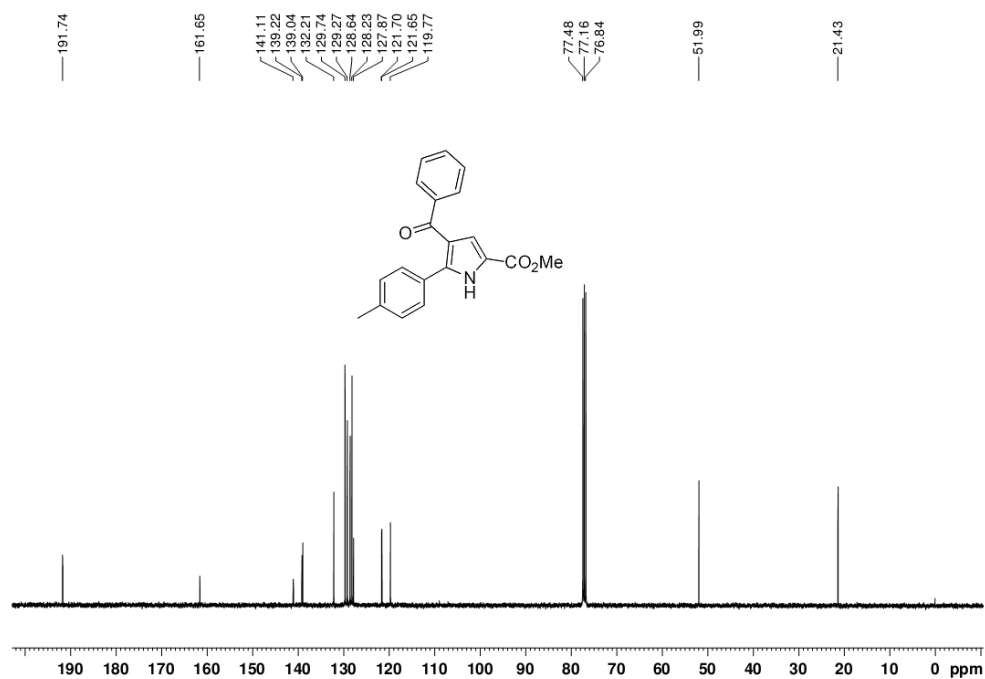

### Electronic Supplementary Material

#### methyl 4-benzoyl-5-(*o*-tolyl)-1H-pyrrole-2-carboxylate (3ai)

$^1\text{H}$  NMR (400 MHz,  $\text{CDCl}_3$ )

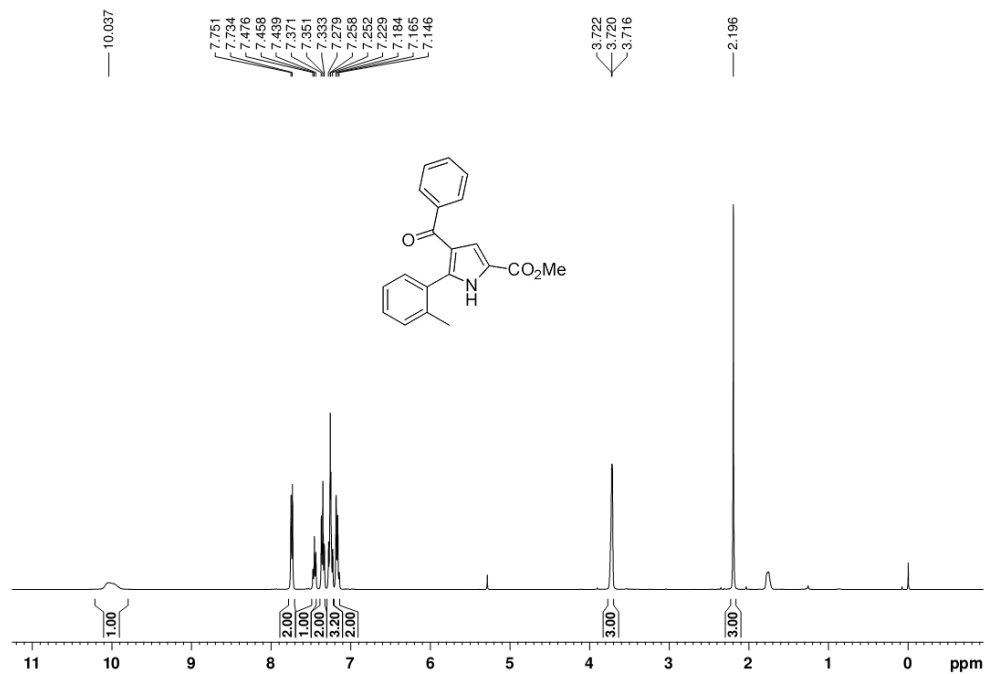

$^{13}\text{C}$  NMR (100 MHz,  $\text{CDCl}_3$ )

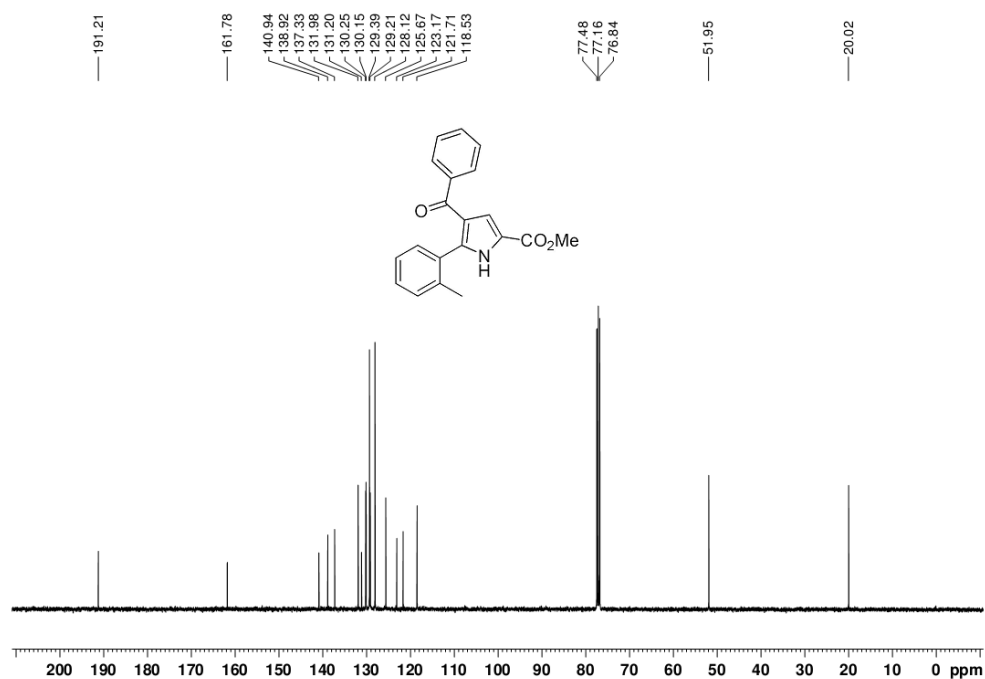

### Electronic Supplementary Material

#### methyl 4-benzoyl-5-cyclohexyl-1H-pyrrole-2-carboxylate (3aj)

$^1\text{H}$  NMR (400 MHz,  $\text{CDCl}_3$ )

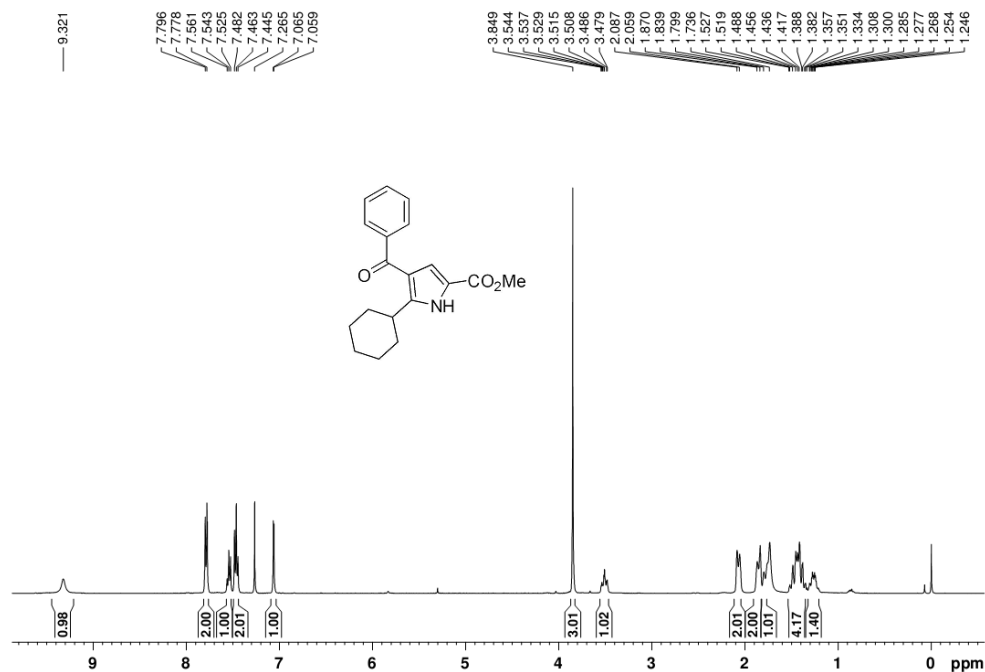

$^{13}\text{C}$  NMR (100 MHz,  $\text{CDCl}_3$ )

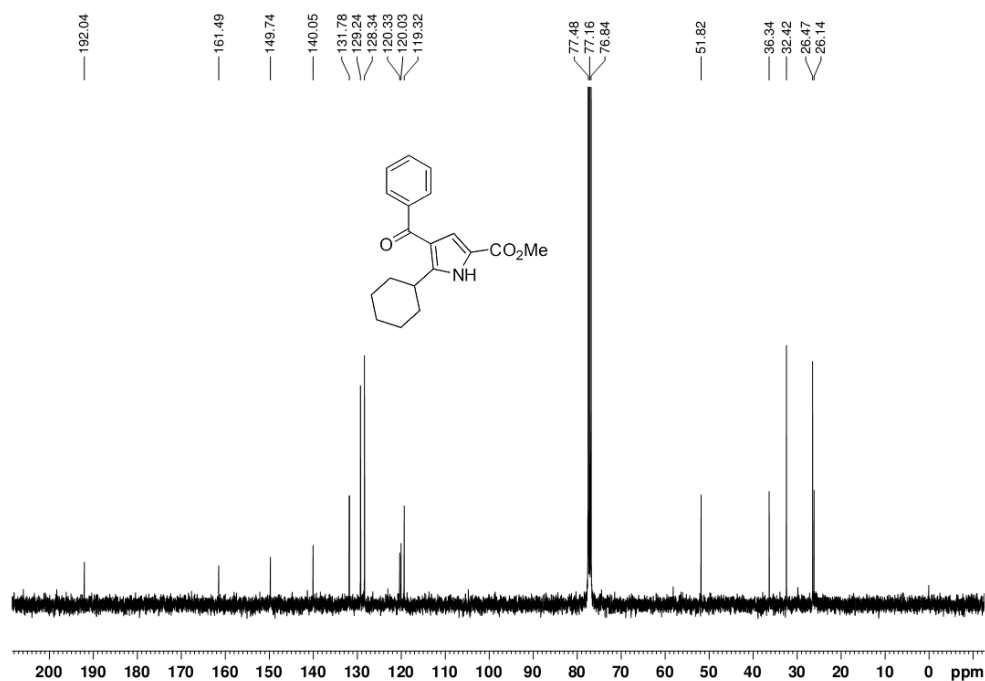

Supplement: c3nj00067b.pdf [file c3nj00067b.pdf]
